# Supplementary material for: A central mechanism of analgesia in mice and humans lacking the sodium channel NaV1.7
Source: PubMed Central journal article supplement (PMC8110947; doi:10.1016/j.neuron.2021.03.012), 2021-05-05
Supplement: mmc2.pdf [file mmc2.pdf]

# A central mechanism of analgesia in mice and humans lacking the sodium channel Na<sub>v</sub>1.7

## Highlights

- Loss of sodium channel Na<sub>v</sub>1.7 abolishes pain without silencing peripheral nociceptors
- Synaptic input to dorsal horn is compromised by an opioid-dependent mechanism
- Impaired neurotransmission from olfactory sensory neurons is opioid independent
- Blocking opioid receptors reverses analgesia in mice and humans lacking Na<sub>v</sub>1.7

## Authors

Donald Iain MacDonald,  
Shafaq Sikandar, Jan Weiss, ...,  
Robert M. Brownstone, Frank Zufall,  
John N. Wood

## Correspondence

donald.macdonald.15@ucl.ac.uk (D.I.M.),  
j.wood@ucl.ac.uk (J.N.W.)

## In brief

Loss of the peripheral sodium channel Na<sub>v</sub>1.7 causes profound insensitivity to pain. MacDonald et al. show that nociceptor activity is unaffected by Na<sub>v</sub>1.7 deletion but that synaptic input to the dorsal horn is compromised by an opioid-dependent mechanism. Blocking central opioid receptors reverses analgesia in mice and humans lacking Na<sub>v</sub>1.7.

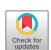

## Article

# A central mechanism of analgesia in mice and humans lacking the sodium channel $Na_v1.7$

Donald Iain MacDonald,<sup>1,\*</sup> Shafaq Sikandar,<sup>2</sup> Jan Weiss,<sup>3</sup> Martina Pyrski,<sup>3</sup> Ana P. Luiz,<sup>1</sup> Queensta Millet,<sup>1</sup> Edward C. Emery,<sup>1</sup> Flavia Mancini,<sup>4</sup> Gian D. Iannetti,<sup>4,5</sup> Sascha R.A. Alles,<sup>1</sup> Manuel Arcangeletti,<sup>1</sup> Jing Zhao,<sup>1</sup> James J. Cox,<sup>1</sup> Robert M. Brownstone,<sup>6</sup> Frank Zufall,<sup>3</sup> and John N. Wood<sup>1,7,\*</sup>

<sup>1</sup>Molecular Nociception Group, Wolfson Institute for Biomedical Research, University College London, Gower Street, London WC1E 6BT, UK

<sup>2</sup>Centre for Experimental Medicine & Rheumatology, Queen Mary University of London, Charterhouse Square, London EC1M 6BQ, UK

<sup>3</sup>Center for Integrative Physiology and Molecular Medicine, Saarland University, 66421 Homburg, Germany

<sup>4</sup>Department of Neuroscience, Physiology and Pharmacology, University College London, Gower Street, London WC1E 6BT, UK

<sup>5</sup>Neuroscience and Behaviour Laboratory, Istituto Italiano di Tecnologia, Rome, Italy

<sup>6</sup>UCL Queen Square Institute of Neurology, London WC1N 3BG, UK

<sup>7</sup>Lead contact

\*Correspondence: [donald.macdonald.15@ucl.ac.uk](mailto:donald.macdonald.15@ucl.ac.uk) (D.I.M.), [j.wood@ucl.ac.uk](mailto:j.wood@ucl.ac.uk) (J.N.W.)

<https://doi.org/10.1016/j.neuron.2021.03.012>

## SUMMARY

Deletion of *SCN9A* encoding the voltage-gated sodium channel  $Na_v1.7$  in humans leads to profound pain insensitivity and anosmia. Conditional deletion of  $Na_v1.7$  in sensory neurons of mice also abolishes pain, suggesting that the locus of analgesia is the nociceptor. Here we demonstrate, using *in vivo* calcium imaging and extracellular recording, that  $Na_v1.7$  knockout mice have essentially normal nociceptor activity. However, synaptic transmission from nociceptor central terminals in the spinal cord is greatly reduced by an opioid-dependent mechanism. Analgesia is also reversed substantially by central but not peripheral application of opioid antagonists. In contrast, the lack of neurotransmitter release from olfactory sensory neurons is opioid independent. Male and female humans with  $Na_v1.7$ -null mutations show naloxone-reversible analgesia. Thus, inhibition of neurotransmitter release is the principal mechanism of anosmia and analgesia in mouse and human  $Nav1.7$ -null mutants.

## INTRODUCTION

Chronic pain afflicts a fifth of the population, but effective analgesics are few (Breivik et al., 2006). We urgently need new molecular targets to develop improved painkillers. One strategy is to identify genes involved in rare human monogenic pain disorders. Loss-of-function mutations in the gene *SCN9A*, encoding the voltage-gated sodium channel  $Na_v1.7$ , lead to congenital insensitivity to pain (CIP) and anosmia, but innocuous sensation remains intact (Cox et al., 2006; Weiss et al., 2011). Gain-of-function mutations in *SCN9A* are associated with ongoing pain (Faber et al., 2012; Fertleman et al., 2006; Yang et al., 2004). Given the enriched expression of  $Na_v1.7$  in nociceptors, these discoveries point to a key role of  $Na_v1.7$  in controlling nociception in humans (Black et al., 2012). Because  $Na_v1.7$ -null individuals are wholly pain free, this channel is a promising, human-validated drug target for pain relief.

Paradoxically, pharmacological blockade of the channel does not appear to be able to recapitulate the analgesia associated with functional deletion of the *SCN9A* gene (Emery et al., 2016a). It has been assumed that  $Na_v1.7$  plays a key role in action potential initiation in the peripheral nerve endings of nociceptors. However, neurogenic inflammation dependent on action potential propagation is not compromised in  $Na_v1.7$  nulls suggesting that

peripheral terminals of sensory neurons are still functional in the absence of  $Na_v1.7$  (Gingras et al., 2014; McDermott et al., 2019; Vetter et al., 2017). Nonetheless, conditional knockout of *Scn9a* only in peripheral sensory neurons of mice reproduces the pain insensitivity of  $Na_v1.7$ -null humans, affirming peripheral sensory neurons as the locus of analgesia. These animals show profound behavioral deficits in thermal, mechanical, inflammatory, and some forms of neuropathic pain (Minett et al., 2012, 2014)

Loss of  $Na_v1.7$  expression in peripheral sensory neurons leads to enhanced endogenous opioid peptide synthesis and potentiated opioid receptor function in sensory neurons (Isensee et al., 2017; Minett et al., 2015). A role of opioid signaling in  $Nav1.7$ -null analgesia has been confirmed through use of the opioid antagonist naloxone, which substantially reverses analgesia associated with channel deletion (Minett et al., 2015). Reversal of analgesia as a result of combined deletion of  $\mu$  and  $\delta$  opioid receptors to the same level as that achieved with naloxone provides further support for an important contribution of endogenous opioid signaling to  $Nav1.7$ -null-mediated analgesia (Pereira et al., 2018). In this study, we addressed the mechanism of  $Na_v1.7$ -null analgesia, using complementary optical, electrophysiological, and pharmacological methods to study nociceptor function *in vivo* in mice and humans lacking  $Na_v1.7$ .

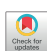

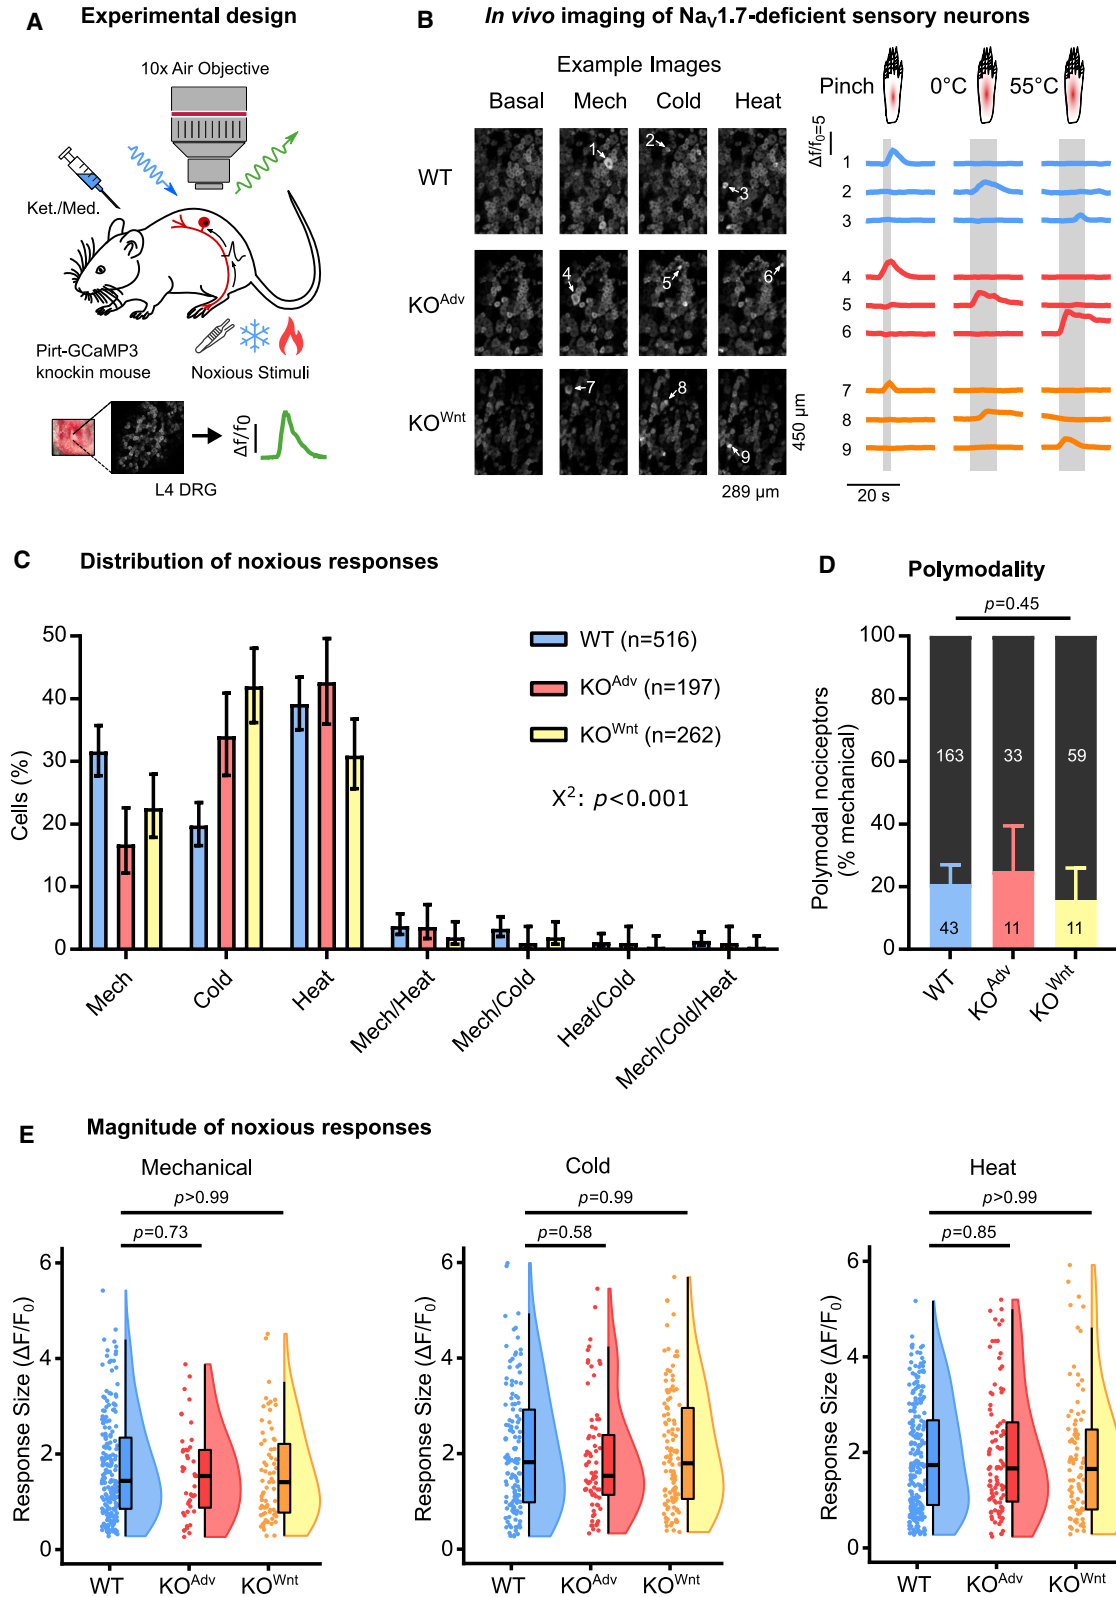

(legend on next page)

## RESULTS

**Deletion of  $Na_v1.7$  in sensory neurons decreases pain sensitivity without silencing peripheral nociceptors**

We deleted *Scn9a* encoding  $Na_v1.7$  in peripheral sensory neurons of mice. Advillin-Cre or Wnt1-Cre was used to excise the floxed *Scn9a* allele, resulting in knockout of  $Na_v1.7$  restricted to sensory neurons or neural crest-derived neurons, respectively (Minett et al., 2012). We performed whole-cell voltage-clamp recordings of voltage-gated sodium currents in cultured sensory neurons from control animals homozygous for the floxed *Scn9a* allele, here called wild type (WT). Application of the  $Na_v1.7$ -specific antagonist PF-05089771 (PF-771, 100 nM for 5 min) showed that ~50% of the peak sodium current in medium-diameter nociceptor-like neurons can be attributed to  $Na_v1.7$  (Figures S1A and S1B; Alexandrou et al., 2016). In contrast, PF-771 had no effect on voltage-gated sodium currents recorded in sensory neurons from Advillin-Cre  $Na_v1.7$  knockout ( $KO^{Adv}$ ) or Wnt1-Cre  $Na_v1.7$  knockout ( $KO^{Wnt}$ ) mice, confirming functional loss of the channel (Figures S1C and S1D). In common with human  $Na_v1.7$ -null individuals, both lines of conditional  $Na_v1.7$  KOs showed a profound analgesic phenotype characterized by increased withdrawal thresholds to noxious thermal and mechanical stimuli but intact responses to innocuous cold and tactile stimuli (Figures S2A–S2D).

To test the hypothesis that loss of  $Na_v1.7$  silences nociceptors, we monitored the responses of peripheral sensory neurons to noxious stimulation using *in vivo* calcium imaging (Emery et al., 2016b). We generated conditional  $Na_v1.7$  KO and WT mice on a Pirt-GCaMP3 background, where GCaMP3 is found in all peripheral sensory neurons (Kim et al., 2014). Using laser-scanning confocal microscopy, we imaged calcium signals in sensory neuron somata in the L4 dorsal root ganglia of live anesthetized animals (Figure 1A).  $Na_v1.7$ -deficient sensory neurons readily responded to all noxious stimuli applied to the hindpaw (Figure 1B). We classified responding neurons into functionally defined cell types. Every cell type was present in WT and KO animals, but differences were apparent in the distribution of responses (Figure 1C). Fewer cells responded to noxious pinch in  $KO^{Adv}$  (44 of 197, 22%) and  $KO^{Wnt}$  (70 of 262, 27%) compared with WT (206 of 516, 40%) animals. This could be linked to loss of excitability in some nociceptors observed in *in vitro* culture experiments (Raouf et al., 2012). We observed a corresponding

increase in the proportion of cold-sensing neurons in  $KO^{Adv}$  (73 of 197, 37%) and  $KO^{Wnt}$  (117 of 262, 45%) versus WT (132/516, 26%) animals. Importantly, the relative number of cells responding to noxious heat was not altered markedly between WT (234 of 516, 45%),  $KO^{Adv}$  (95 of 197, 48%), and  $KO^{Wnt}$  (88 of 262, 34%) lines despite behavioral insensitivity to heat (Figure S2C). We wondered whether polymodal nociceptors were silenced by loss of  $Na_v1.7$ , here defined as pinch-sensitive cells that also respond to thermal stimuli. Polymodality did not differ between genotypes and was similar to previous reports, with 21% of WT, 25% of  $KO^{Adv}$ , and 16% of  $KO^{Wnt}$  neurons categorized as polymodal (Figure 1D; Emery and Wood, 2019; Emery et al., 2016b; Lawson et al., 2019; Wang et al., 2018). Last, we measured the peak calcium signal ( $\Delta F/F_0$ ) as a surrogate measure of single neuron excitability. When we quantified this for each stimulus type, there was no effect of  $Na_v1.7$  deletion on the maximum calcium responses (Figure 1E). Overall, although the distribution of cold and mechanical responses was altered, we found little evidence, using calcium imaging, of decreased nociceptor excitability in animals lacking  $Na_v1.7$ , with no change in peak response magnitude to any stimulus, prevalence of polymodality, or number of noxious heat responses. Broadly similar results were obtained by calcium imaging of WT and  $KO^{Adv}$  mice virally expressing GCaMP6f (Figures S3A–S3D).

Although calcium imaging is ideally suited to monitoring population activity, we cannot directly measure action potential firing. We reasoned that this method may not be sensitive to subtler effects of  $Na_v1.7$  deletion on excitability. We therefore performed multi-unit extracellular recordings from dorsal root ganglia of live  $Na_v1.7$  KO and WT animals. For these experiments, we pooled data obtained from the  $KO^{Adv}$  and  $KO^{Wnt}$  lines, quantifying the number of action potentials fired in 10 s by polymodal afferents to peripheral stimuli of various modalities (Figure 2A). Firing evoked by noxious mechanical prodding was unchanged after deletion of  $Na_v1.7$  (Figure 2B). Intriguingly, although firing in response to most von Frey stimuli was normal, suprathreshold responses to 8-, 15-, and 26-g hairs showed a small reduction (Figure 2C). This is in spite of the normal hindpaw von Frey thresholds of  $Na_v1.7$  KO mice (Figure S2B). As expected, innocuous brush stimuli evoked action potentials equally well in WT and KO animals (Figure 2D). There was no appreciable change in the number of spikes triggered by ice water (Figure 2E) or noxious heat stimuli (Figure 2F). These data show that the

**Figure 1.  $Na_v1.7$ -deficient sensory neurons respond to noxious stimuli at the level of the soma *in vivo***

(A) Schematic of the *in vivo* DRG imaging setup.

(B) Example images and traces showing sensory neurons respond to noxious mechanical and thermal stimuli in WT and both  $Na_v1.7$  KO mouse lines. Each numbered trace corresponds to one cell. The data in this figure were obtained from 19 WT, 8  $KO^{Adv}$ , and 11  $KO^{Wnt}$  animals.

(C) Bar plot summarizing the distribution of all sensory neurons that responded to different noxious stimuli in WT and  $Na_v1.7$  KO animals. The error bars represent 95% confidence intervals, and proportions were compared using a chi-square test.  $n = 516$  cells from WT (blue),  $n = 197$  cells from  $KO^{Adv}$  (red), and  $n = 262$  cells from  $KO^{Wnt}$  (yellow).

(D) Bar plot showing a similar prevalence of polymodal nociceptors in WT and  $Na_v1.7$  KO mice. Polymodal nociceptors are defined as pinch-sensitive neurons that respond to any noxious thermal stimulus (color) and are expressed as a fraction of mechanically sensitive cells (black). The error bars represent 95% confidence intervals, and proportions were compared using the chi-square test.  $n = 206$  cells from WT,  $n = 44$  cells from  $KO^{Adv}$ , and  $n = 70$  cells from  $KO^{Wnt}$ .

(E) Raincloud plots showing similar peak calcium responses ( $\Delta F/F_0$ ) evoked by different noxious stimuli for WT and  $Na_v1.7$  KO lines. The mean response magnitude of KO lines was compared with the WT control using one-way ANOVA followed by post hoc Dunnett's test. Mechanical:  $n = 206$  cells from WT,  $n = 44$  cells from  $KO^{Adv}$ , and  $n = 70$  cells from  $KO^{Wnt}$ . Cold:  $n = 132$  cells from WT,  $n = 73$  cells from  $KO^{Adv}$ , and  $n = 117$  cells from  $KO^{Wnt}$ . Heat:  $n = 234$  cells from WT,  $n = 95$  cells from  $KO^{Adv}$ , and  $n = 88$  cells from  $KO^{Wnt}$ .

See also Figures S1–S3.

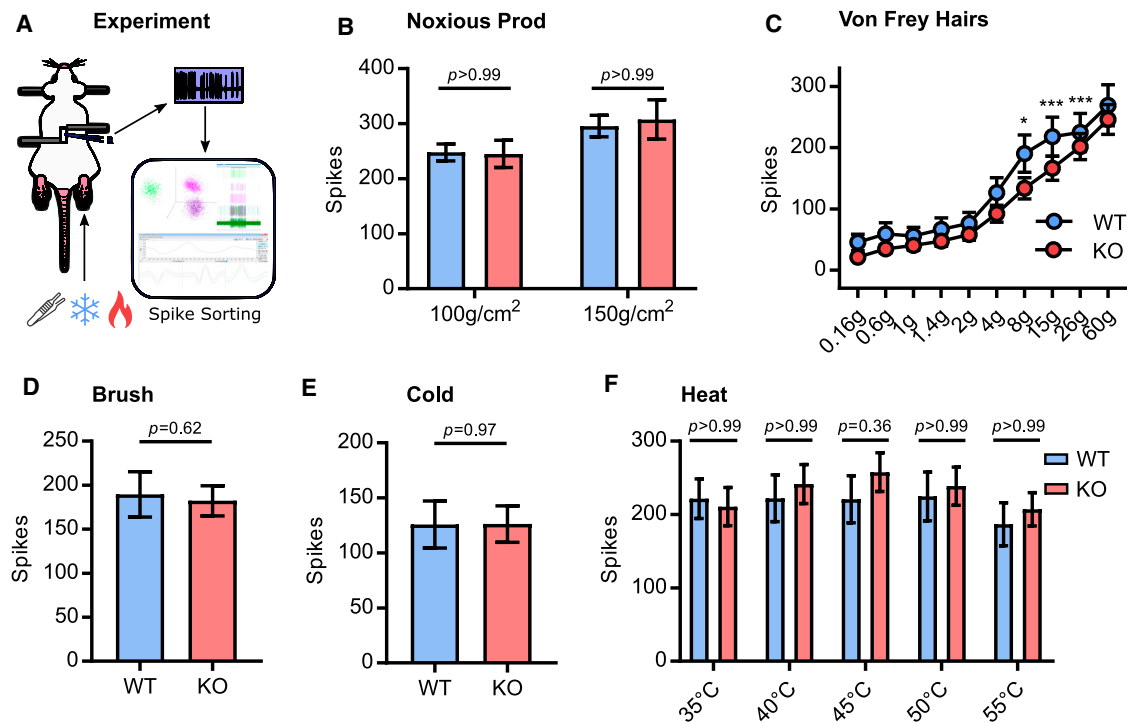

**Figure 2. Excitability of  $\text{Na}_v1.7$ -deficient sensory neurons *in vivo***

(A) Schematic of the *in vivo* DRG extracellular recording setup.

(B) Quantification of spikes fired in response to noxious prodding in WT (blue) and  $\text{Na}_v1.7$  KO (red). Data from Advillin-Cre and Wnt1-Cre  $\text{Na}_v1.7$  KO mice were pooled for these experiments.

(C) Quantification of spikes fired in response to von Frey hair stimulation. For 8 g,  $p = 0.014$ . For 15 g,  $p < 0.001$ . For 26 g,  $p < 0.001$ .

(D) Quantification of spikes fired in response to brushing.

(E) Quantification of spikes fired in response to cooling.

(F) Quantification of spikes fired in response to heating.

For (B), (C), and (F), mean numbers of spikes fired in 10 s were compared using repeated-measures two-way ANOVA followed by post hoc Bonferroni test. For (D) and (E), means were compared using an unpaired t test. Error bars represent 95% confidence interval around the mean.  $n = 90$  cells from 10 WT animals, and  $n = 146$  cells from 13  $\text{KO}^{\text{Adv/Wnt}}$  animals.

diminished sensitivity of  $\text{Na}_v1.7$  KO mice to noxious heat or mechanical stimuli cannot be explained by decreased peripheral nociceptor excitability.

Of particular clinical interest is the fact that mice and humans lacking  $\text{Na}_v1.7$  show deficient inflammatory pain sensitization. Prostaglandin E2 (PGE2) is an important inflammatory mediator (Emery et al., 2016b). To investigate the mechanism by which  $\text{Na}_v1.7$  deletion impedes pain sensitization, we tested the effect of intraplantar injection of PGE2 (500  $\mu\text{M}$  for 10 min) on whole-animal behavioral responses and sensory neuron calcium responses to noxious heat stimuli *in vivo* (Figure 3A). Both lines of conditional  $\text{Na}_v1.7$  KO mice failed to develop heat hyperalgesia (Figure 3B). In contrast, intraplantar injection of PGE2 unmasked silent nociceptors and increased heat responses in WT and  $\text{KO}^{\text{Adv}}$  animals virally expressing GCaMP6f, indicating that this form of peripheral sensitization is intact in mice lacking  $\text{Na}_v1.7$  (Figure 3C). We also observed robust sensitizing effects of PGE2 in  $\text{KO}^{\text{Wnt}}$  animals expressing GCaMP3, although the number of silent nociceptors activated was slightly less than WT (Figure 3D).  $\text{Na}_v1.7$  deletion therefore impairs thermal hyperalgesia but, paradoxically, does not

abolish its physiological correlate: peripheral sensitization of nociceptors.

### Loss of $\text{Na}_v1.7$ impairs synaptic transmission from nociceptors

The mechanism of  $\text{Na}_v1.7$  analgesia does not appear to arise from reduced peripheral excitability. We wondered whether the loss of function occurred at the nociceptor central terminal. To test this, we used the fluorescent glutamate sensor iGluSnFR to directly measure glutamate release from sensory afferent central terminals in spinal cord slices (Marvin et al., 2013). First, we virally transfected cultured dorsal root ganglion neurons with iGluSnFR. The iGluSnFR signal was present on the cell membrane and along neurites (Figure S4A). Bath application of a range of glutamate concentrations confirmed the sensitivity of the probe to extracellular glutamate concentrations within the physiological range (Figure S4B). We then virally transduced sensory neurons *in vivo* with iGluSnFR by intraperitoneal injection of AAV9-synapsin-iGluSnFR virus at post-natal day 2 (P2) (Figure S4C). Spinal cord slices were prepared for 2-photon imaging experiments at P9–P21. In the dorsal horn, we observed

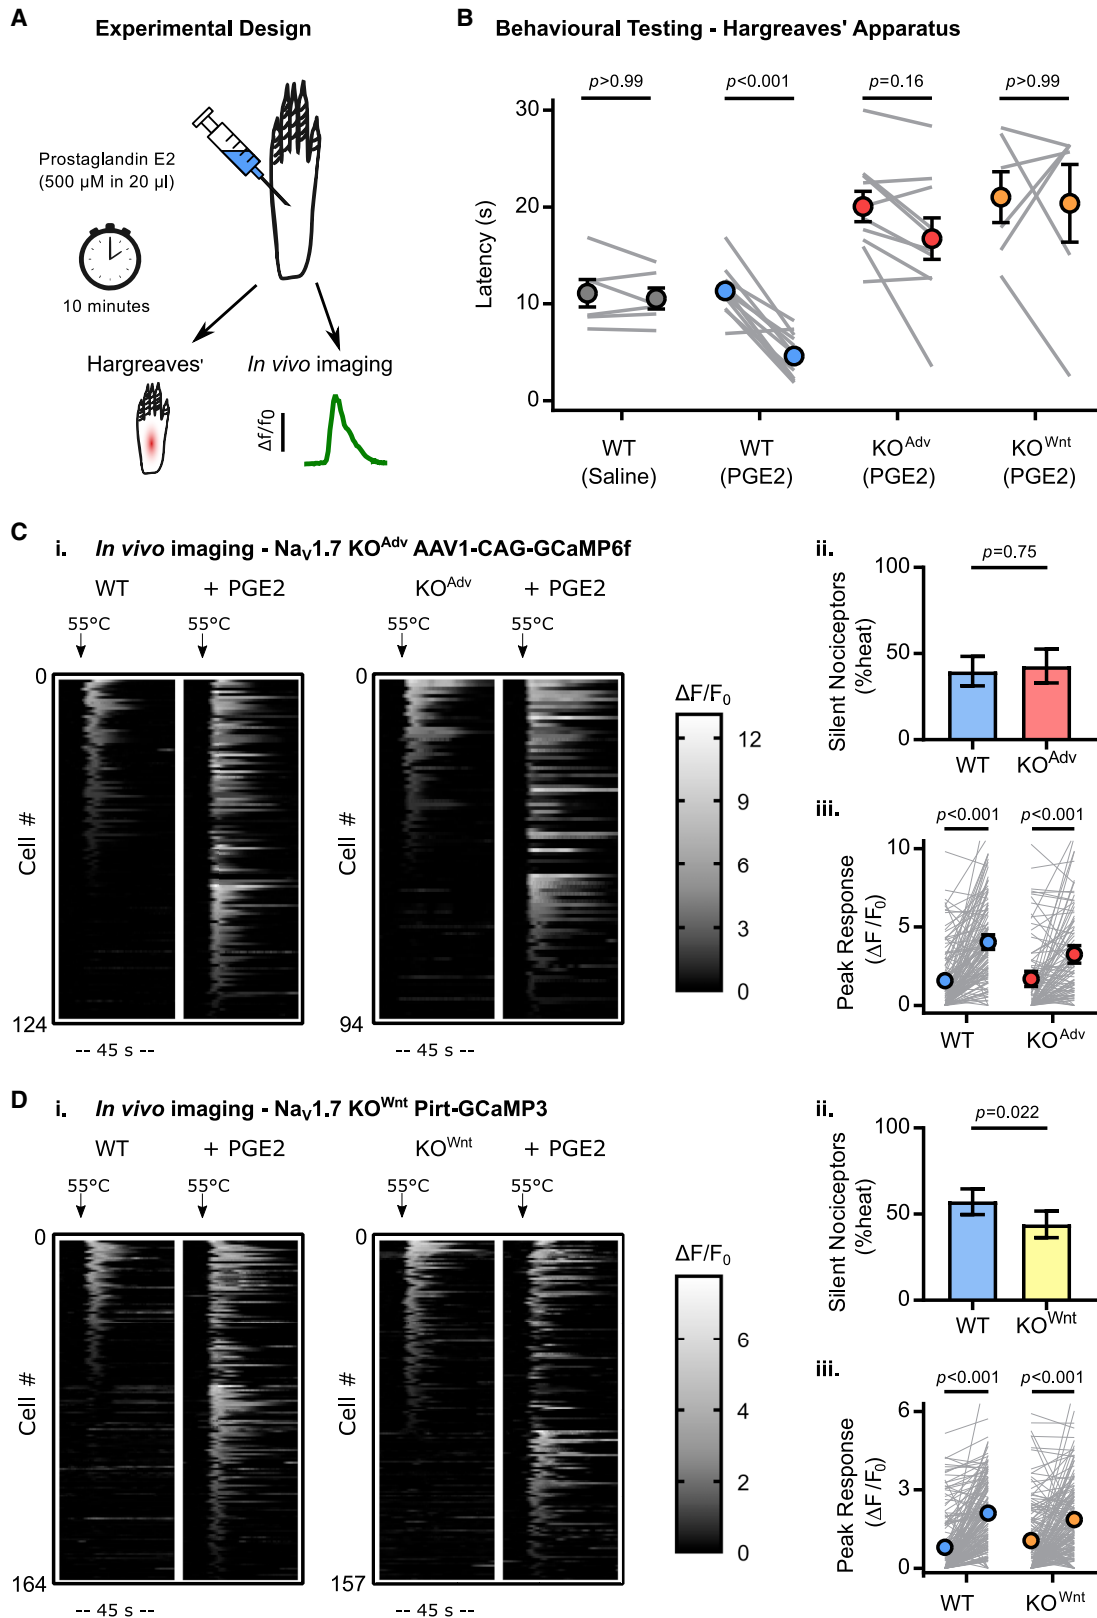

(legend on next page)

iGluSnFR fluorescence in the central processes of incoming afferents, but there was no evidence of iGluSnFR expression in spinal cord neuron somata (Figure S4D). In contrast, confocal imaging showed that iGluSnFR was widely expressed in the cell bodies of sensory neurons in dorsal root ganglia *in vivo*, confirming successful targeting of iGluSnFR to afferent neurons (Figure S4E).

To image synaptic transmission in the spinal cord, dorsal root stimulation was used to evoke neurotransmitter release from central afferent terminals expressing iGluSnFR in WT and KO<sup>Adv</sup> mice (Figure 4A). We restricted our imaging of glutamate signals to lamina II in the dorsal horn of the spinal cord. Two-photon imaging at 10 Hz showed that glutamate release was readily evoked across a range of single-pulse stimulus intensities in dorsal horn of spinal cord slices, with iGluSnFR signals showing spatial localization to regions of interest (Figure 4B). Interestingly, the mean minimum stimulus current required to elicit release in slices from KO<sup>Adv</sup> animals was 891  $\mu$ A, 3-fold greater than the control WT value of 279  $\mu$ A (Figure 4Ci). The EC<sub>50</sub> current was also increased in KO<sup>Adv</sup> slices, with a value of 366  $\mu$ A compared with 181  $\mu$ A in the WT (Figure 4Cii). In addition, the peak fluorescence change ( $\Delta F/F_0$ ) was reduced in KO<sup>Adv</sup> slices (Figure 4Ciii). These data are consistent with a reduction in glutamate release at the central terminal of sensory neurons in Na<sub>v</sub>1.7 KO<sup>Adv</sup> animals.

Next we performed voltage-clamp recordings from lamina II neurons in spinal cord slices. We measured spontaneous excitatory postsynaptic currents (EPSCs), which tracks all excitatory input to the recorded neuron, including mono- and polysynaptic input from afferents expressing Na<sub>v</sub>1.7 (Kanellopoulos et al., 2018). There was a reduction in frequency but not amplitude, consistent with changes in presynaptic release (Figures S5A–S5C). These presynaptic deficits may account for the heightened pain thresholds of mice lacking Na<sub>v</sub>1.7 and associated diminished nociceptive input to the CNS (Minett et al., 2012).

### Opioid receptors are required for synaptic deficits in nociceptors but not olfactory sensory neurons lacking Na<sub>v</sub>1.7

We have shown previously that analgesia in mice and humans lacking Na<sub>v</sub>1.7 requires opioid receptors. This is due to upregulation of preproenkephalin (PENK) and enhanced opioid receptor signaling caused by Na<sub>v</sub>1.7 deletion (Isensee et al., 2017; Minett et al., 2015; Pereira et al., 2018). Does increased opioid signaling account for the synaptic deficits we observe in Na<sub>v</sub>1.7 KOs? We first investigated the effect of systemic naloxone injection *in vivo*

(2 mg/kg subcutaneously for 20 min) on peripheral excitability of nociceptors. To our surprise, *in vivo* imaging experiments revealed that naloxone increased the number of responding cells in WT and KO<sup>Adv</sup> mice, suggesting that tonic endogenous opioid activity is present in our preparation (Figure 5A). Importantly, however, the effect of naloxone on the number and size of responses was comparable across genotypes. Corroborating this, *in vivo* extracellular recording of sensory neurons from WT and KO<sup>Adv</sup> animals found no effect of naloxone on action potential firing in response to noxious heat, cold, or mechanical stimuli (Figure 5B).

Because naloxone did not markedly affect peripheral excitability, we examined the relationship between opioid receptors and synaptic dysfunction in Na<sub>v</sub>1.7 KOs. Spinal cord slices from Na<sub>v</sub>1.7 KO<sup>Adv</sup> animals were treated with vehicle or naloxone while measuring dorsal root stimulation-evoked glutamate release using iGluSnFR. Vehicle-treated KO<sup>Adv</sup> slices showed a mean minimum stimulus current for eliciting release of 690  $\mu$ A. This was reduced to 302  $\mu$ A in naloxone-treated KO<sup>Adv</sup> slices, comparable with the 279  $\mu$ A threshold we observed previously in WT slices (Figure 5C). The EC<sub>50</sub> current was 457  $\mu$ A in the vehicle-treated group and decreased to 173  $\mu$ A after naloxone, essentially identical to the WT value of 181  $\mu$ A. These findings indicate that opioid receptor blockade reverses changes in glutamate release associated with deletion of Na<sub>v</sub>1.7.

Next we tested whether these deficits in neurotransmitter release translated into a loss of noxious input into wide dynamic range (WDR) neurons of the spinal cord that could be reversed with naloxone. We investigated effects of systemic opioid receptor blockade on neural coding of lumbar spinal neurons following peripheral deletion of Na<sub>v</sub>1.7 using *in vivo* extracellular recordings in the deep dorsal horn of WT and KO<sup>Adv</sup> mice. Mechanically evoked activity was assessed using punctate von Frey hairs (Figures 6A and 6D). Thermally evoked activity of spinal neurons was assessed using application of heat (Figure 6B and 6E) and noxious cold with ethyl chloride (Figures 6C and 6F). All stimuli were applied to the hindpaw peripheral receptive field of WDR neurons, and evoked action potentials over 10 s were recorded. WT and KO<sup>Adv</sup> WDR neurons showed graded intensity coding to mechanical and heat stimulation. We then quantified changes in evoked firing and modality-based coding of spinal neurons of WT and KO<sup>Adv</sup> mice following systemic administration of naloxone (2 mg/kg subcutaneously for 20 min). Following opioid receptor blockade, KO<sup>Adv</sup> neurons showed augmented firing evoked by suprathreshold mechanical (8 g,  $p < 0.05$ ; 15 g,  $p < 0.01$ ; 26 g,  $p < 0.01$ ), heat (40°C,  $p < 0.05$ ; 45°C,  $p < 0.05$ ), and

### Figure 3. Na<sub>v</sub>1.7 deletion abolishes inflammatory pain without affecting peripheral sensitization

(A) Schematic illustrating induction of acute inflammatory pain using PGE<sub>2</sub>.  
 (B) Behavioral assessment of the effect of PGE<sub>2</sub> on Hargreaves' withdrawal latencies in WT and Na<sub>v</sub>1.7 KO animals, showing that KO mice do not develop heat hyperalgesia. The error bars represent standard error of the mean. Mean latencies before and after PGE<sub>2</sub> were compared using repeated-measures two-way ANOVA followed by post hoc Sidak's test.  $n = 6$  animals for WT vehicle,  $n = 12$  for WT PGE<sub>2</sub>,  $n = 10$  for KO<sup>Adv</sup> PGE<sub>2</sub>, and  $n = 6$  for KO<sup>Wnt</sup> PGE<sub>2</sub>.  
 (C) Heatmaps (i) and quantification (ii and iii) showing unmasking of silent heat nociceptors by PGE<sub>2</sub> in WT and Na<sub>v</sub>1.7 KO<sup>Adv</sup> animals virally transduced with GCaMP6f.  $n = 124$  cells from 4 WT animals, and  $n = 94$  cells from 4 KO<sup>Adv</sup>.  
 (D) Heatmaps (i) and quantification (ii and iii) showing unmasking of silent heat nociceptors by PGE<sub>2</sub> in WT and Na<sub>v</sub>1.7 KO<sup>Wnt</sup> animals expressing GCaMP3.  $n = 164$  cells from 8 WT animals, and  $n = 157$  cells from 11 KO<sup>Wnt</sup> animals.  
 For (C) and (D), the effect of genotype on PGE<sub>2</sub>-induced unmasking of silent nociceptors was compared using the chi-square test with Yates' correction for proportions (i) and repeated-measures two-way ANOVA followed by post hoc Sidak's test for mean response size (ii). Error bars represent 95% confidence intervals.

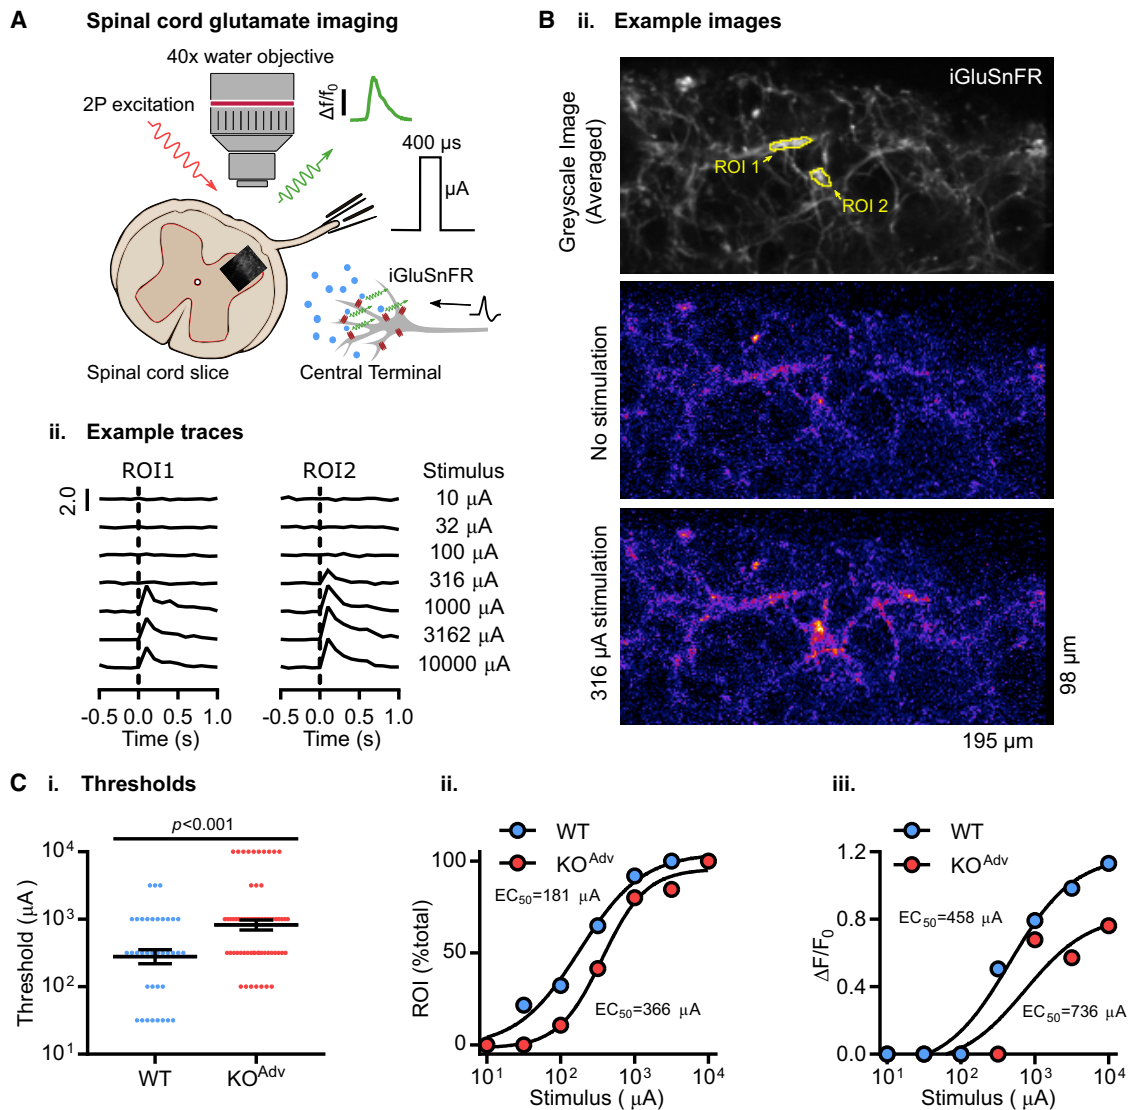

**Figure 4. Decreased neurotransmitter release from the central terminals of  $Na_v1.7$ -deficient sensory neurons**

(A) Schematic illustrating two-photon imaging of iGluSnFR-expressing afferent terminals in the dorsal horn of the spinal cord. iGluSnFR was virally expressed in sensory afferents. In horizontal slices, a suction electrode was used to electrically stimulate the attached dorsal root, driving glutamate release in lamina II of the dorsal horn. Increased extracellular glutamate at afferent terminals resulted in a time-locked increase in iGluSnFR fluorescence.

(B) Example images of an area of lamina II dorsal horn in spinal cord slices from a  $Na_v1.7$  KO<sup>Adv</sup> mouse expressing iGluSnFR in sensory afferent terminals (i). The top image is a greyscale average of the iGluSnFR signal over time, showing the afferent processes. The center image shows the signal in the absence of stimulation. In the bottom image, electrical stimulation causes localized increases in iGluSnFR fluorescence in discrete areas of the image. Two such areas are identified as regions of interest: region of interest (ROI) 1 and ROI 2. The images are pseudocolored to emphasize changes in fluorescence. Also shown are example traces of normalized increases in fluorescence ( $\Delta F/F_0$ ) from each ROI to different single-pulse stimulation intensities applied to the dorsal root (ii).

(C) Plots showing that the threshold current required to evoke glutamate release is increased in slices from KO<sup>Adv</sup> mice. For (i), the mean absolute threshold was compared between genotypes using an unpaired t test. Error bars represent standard error of the mean. For (ii), WT EC<sub>50</sub> = 181  $\mu$ A,  $r^2$  = 0.99; KO<sup>Adv</sup> EC<sub>50</sub> = 366  $\mu$ A,  $r^2$  = 0.99. For (iii), median evoked glutamate release ( $\Delta F/F_0$ ) was compared between genotypes. WT EC<sub>50</sub> = 458  $\mu$ A,  $r^2$  = 0.98; KO<sup>Adv</sup> EC<sub>50</sub> = 736  $\mu$ A,  $r^2$  = 0.86.  $n$  = 37 ROIs from 4 WT animals, and  $n$  = 65 ROIs from 6 KO<sup>Adv</sup> mice. See also Figures S4 and S5.

cold ( $p < 0.01$ ) stimulation. We observed no significant difference in coding of spinal neurons of KO<sup>Adv</sup> mice to innocuous intensities of mechanical and heat stimuli. Moreover, opioid receptor antagonism did not affect nociceptive response profiles of WT neurons to mechanical, thermal, or cold stimulation ( $p > 0.05$  for all measures). These observations, coupled with earlier

studies of opioid receptor-dependent analgesia and loss of neuropeptide release, highlight a significant deficit in neurotransmission that is opioid dependent in the absence of  $Na_v1.7$  (Minett et al., 2012, 2015).

Mice lacking  $Na_v1.7$  in olfactory sensory neurons ( $Nav1.7$  KO<sup>OMP</sup>) are totally anosmic because of loss of transmitter release



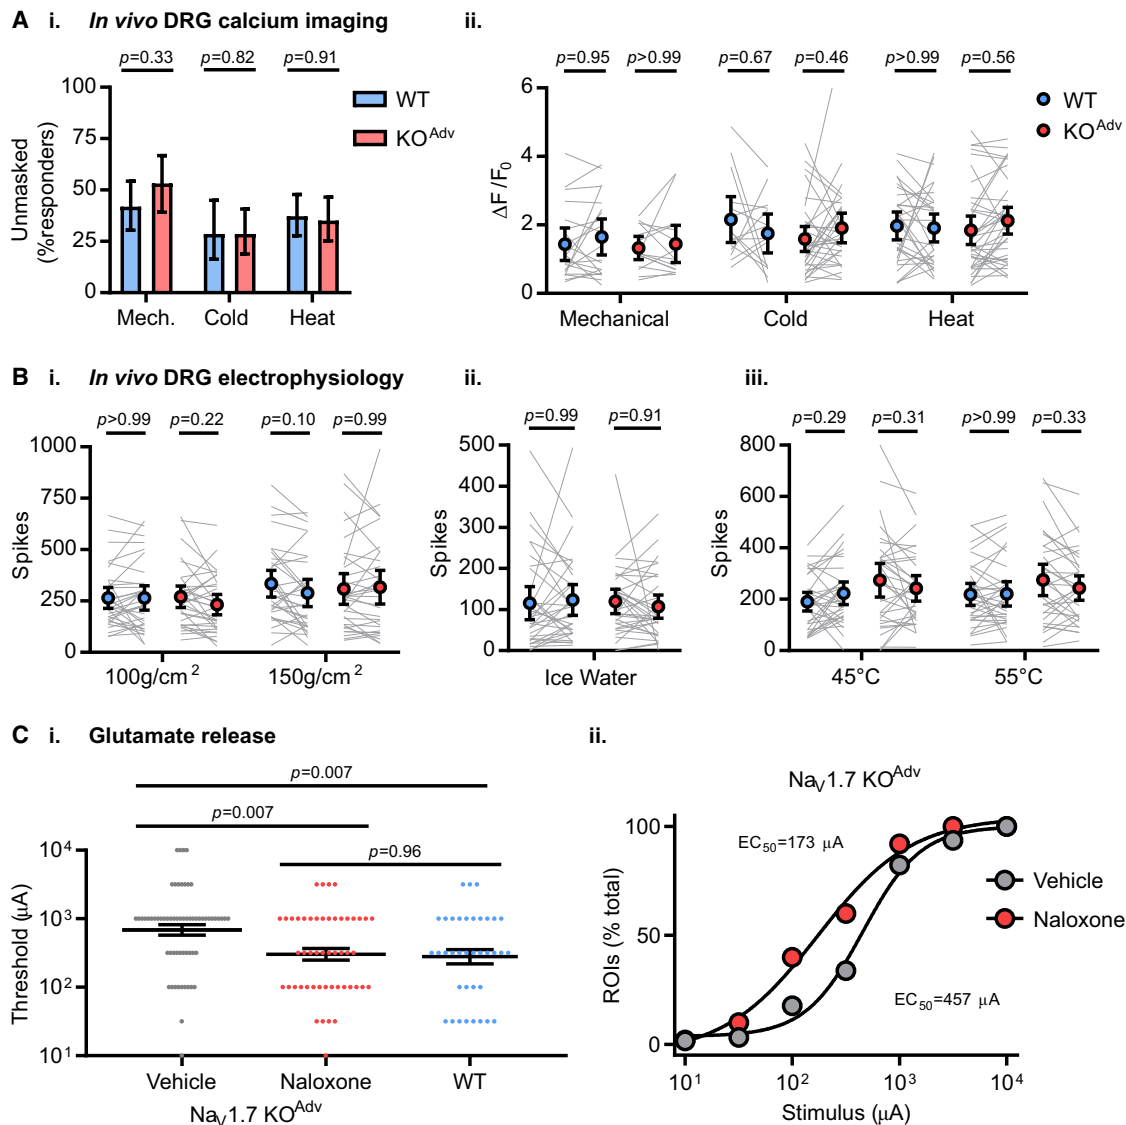

**Figure 5. Opioid receptor blockade rescues impaired neurotransmission after Nav1.7 deletion but does not affect peripheral excitability**

(A) *In vivo* imaging of sensory neuron activity before and after treatment with systemic naloxone (2 mg/kg subcutaneously for 20 min) in WT (blue) and Nav1.7 KO<sup>Adv</sup> (red) mice. Naloxone unmasked previously silent neurons in WT and KO<sup>Adv</sup> mice (i). Proportions were compared using chi-square test with Yates' correction. Naloxone had no effect on the peak calcium responses evoked by noxious stimuli in either genotype (ii). Mean peak calcium responses before and after naloxone were compared using repeated-measures two-way ANOVA followed by post hoc Sidak's test. Data were obtained from 4 WT and 6 KO<sup>Adv</sup> animals. Mechanical: n = 62 cells from WT, n = 47 cells from KO<sup>Adv</sup>. Cold: n = 35 cells from WT, n = 63 cells from KO<sup>Adv</sup>. Heat: n = 86 cells from WT, n = 74 cells from KO<sup>Adv</sup>. (B) *In vivo* extracellular recording of sensory neuron action potential firing before and after treatment with systemic naloxone (2 mg/kg subcutaneously for 20 min) in WT (blue) and Nav1.7 KO<sup>Adv</sup> (red) mice. Naloxone had no effect on spiking evoked by noxious mechanical (i), ice water (ii) or heat (iii) stimuli. Mean spikes fired before and after naloxone were compared using repeated-measures two-way ANOVA followed by post hoc Sidak's test. n = 33 from 6 WT animals, and n = 33 from 7 KO<sup>Adv</sup> animals.

(C) *Ex vivo* iGluSnFR imaging of glutamate release from sensory neuron central terminals in dorsal horn of spinal cord slices from 6 KO<sup>Adv</sup> animals treated with vehicle (gray) or 100  $\mu$ M naloxone (red). Naloxone reduced the mean threshold (i) and EC<sub>50</sub> (ii) current required to elicit release to WT levels (blue). n = 62 ROIs for vehicle and n = 50 for naloxone in KO<sup>Adv</sup>.

The WT data are the same as in Figure 4C (n = 37). Means were compared using one-way ANOVA followed by post hoc Tukey test. Error bars represent standard error of the mean.

from olfactory nerve terminals (Weiss et al., 2011). To investigate whether these synaptic deficits are also dependent on opioid receptors, we recorded mitral/tufted (M/T) cells in horizontal olfactory bulb slices of KO<sup>OMP</sup> mice. As expected, electrical stimula-

tion (1 ms, 100 V) of the olfactory nerve layer harboring the olfactory sensory neuron axon terminals did not elicit a postsynaptic current in M/T cells of Nav1.7 KO<sup>OMP</sup> mice (Figure 7A). To test whether the opioid receptor antagonist naloxone could

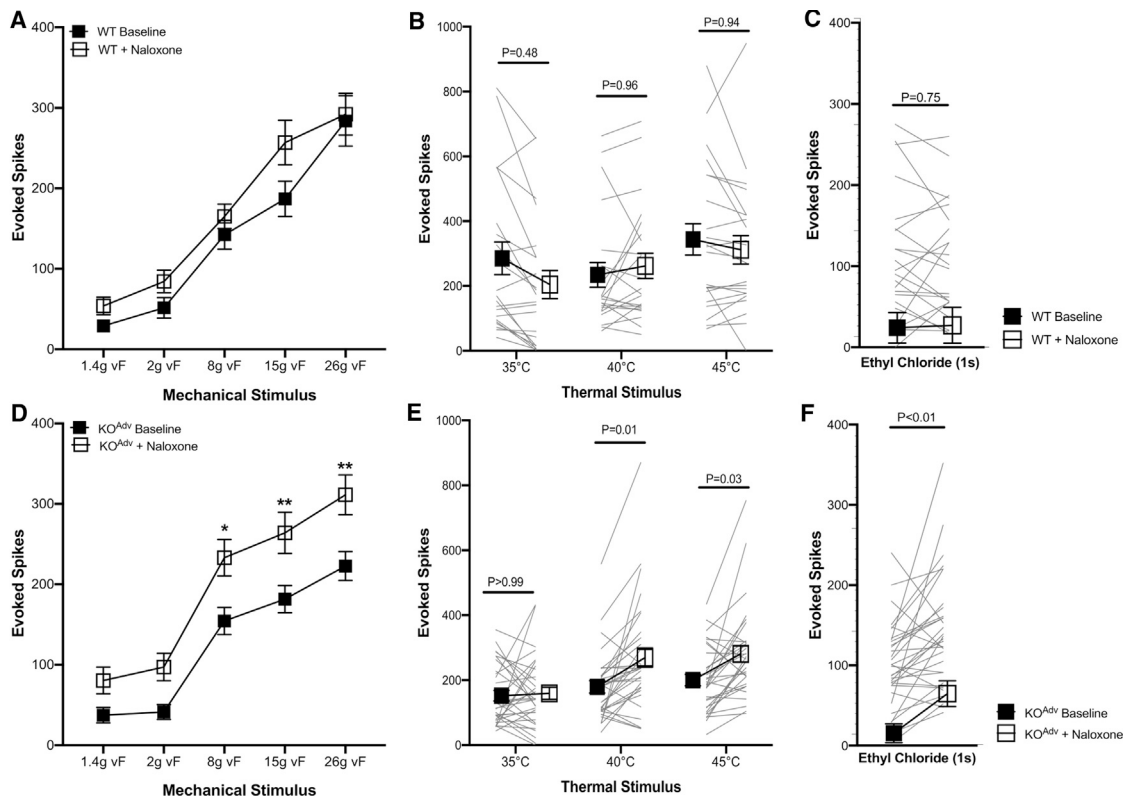

**Figure 6. Impaired spinal sensory coding of noxious stimuli in peripheral  $\text{Na}_v1.7$  KO mice is reversed by opioid receptor blockade**

(A–F) Evoked activity of wide-dynamic-range deep dorsal horn neurons in WT and  $\text{KO}^{\text{Adv}}$  to (A and D) von Frey mechanical stimuli, (B and E) heat stimuli, and (C and F) noxious cold stimulation with ethyl chloride. Response profiles of 22 WDR neurons from WT mice ( $n = 7$ ) and 32 WDR neurons from KO mice ( $n = 10$ ) were recorded. Data are shown as mean number of action potentials fired  $\pm$  SEM. \* $p < 0.05$ , \*\* $p < 0.01$ . All data were analyzed with two-way repeated-measures ANOVA with post hoc Sidak's test (A, B, D, and E) and paired t test (C and F) with significance set at  $p > 0.05$ .

restore transmitter release at this synapse, we bath-applied 300  $\mu\text{M}$  naloxone for at least 10 min and recorded olfactory nerve-evoked responses in 17 M/T cells (5 animals). Naloxone did not lead to an increase in excitatory post-synaptic current (EPSC) amplitude (Figure 7B) ( $\text{Nav}1.7\text{KO}^{\text{OMP}}$  pre,  $-14 \pm 0.4$  pA;  $\text{Na}_v1.7\text{KO}^{\text{OMP}}$  naloxone,  $-13.9 \pm 0.03$  pA). To exclude the possibility that naloxone affects transmitter release in general at this synapse, we additionally recorded M/T cells of control mice ( $\text{Nav}1.7^{\text{control}}$ , 7 cells in 4 animals). Olfactory nerve stimulation caused activation of characteristic inward currents in M/T cells of control mice, with amplitudes of  $-165 \pm 20$  pA. Application of naloxone to the slice had only minor effects on evoked EPSCs ( $-148 \pm 37$  pA) (Figures 7A and 7B). As further corroboration, animals were injected intraperitoneally 3 times (30-min interval) with naloxone (2 mg/kg) or PBS and kept in the odor-rich environment of their home cage for the next 24 h. Animals were then sacrificed and perfused, and olfactory bulb coronal sections were stained against tyrosine hydroxylase (TH) protein. TH expression in olfactory bulb juxtglomerular neurons is a correlate of afferent synaptic input because it requires odor-stimulated glutamate release from olfactory sensory neuron (OSN) terminals (Weiss et al., 2011). There was no obvious difference between PBS- and naloxone-treated animals in the amount of TH expression, with low to no expression of TH in  $\text{KO}^{\text{OMP}}$  mice and high expression

in control mice (Figure 7C). These results are consistent with the finding that, in  $\text{Nav}1.7^{\text{control}}$  mice, treatment with a cocktail of opioid receptor agonists did not affect EPSCs evoked by olfactory nerve stimulation (Figure 7D). Tetrodotoxin (TTX), on the other hand, completely abolished synaptic transmission from OSNs to M/T cells (Figure 7E).

### Pain insensitivity of mice and humans lacking $\text{Na}_v1.7$ depends on opioid signaling

Is suppression of synaptic transmission by the opioid system required for analgesia? To test this in awake behaving animals, we selectively blocked opioid receptors in the peripheral, central, or both compartments of the nociceptor (Figure 8A). We measured withdrawal latencies to radiant heat stimuli as a readout. To test whether central opioid receptors are required, we injected naloxone (3 mM in 5  $\mu\text{L}$ ) by intrathecal injection into the lumbar spinal column. Centrally administered naloxone was sufficient to reverse thermal hypo-sensitivity in  $\text{Na}_v1.7$   $\text{KO}^{\text{Adv}}$  mice by 76%. There was no effect of intrathecal vehicle injection (Figure 8B). Naloxone methiodide is a peripherally restricted naloxone analog that does not cross the blood-brain barrier and, hence, selectively blocks peripheral opioid receptors (Melo et al., 2018). Systemic administration of naloxone methiodide (2 mg/kg) had

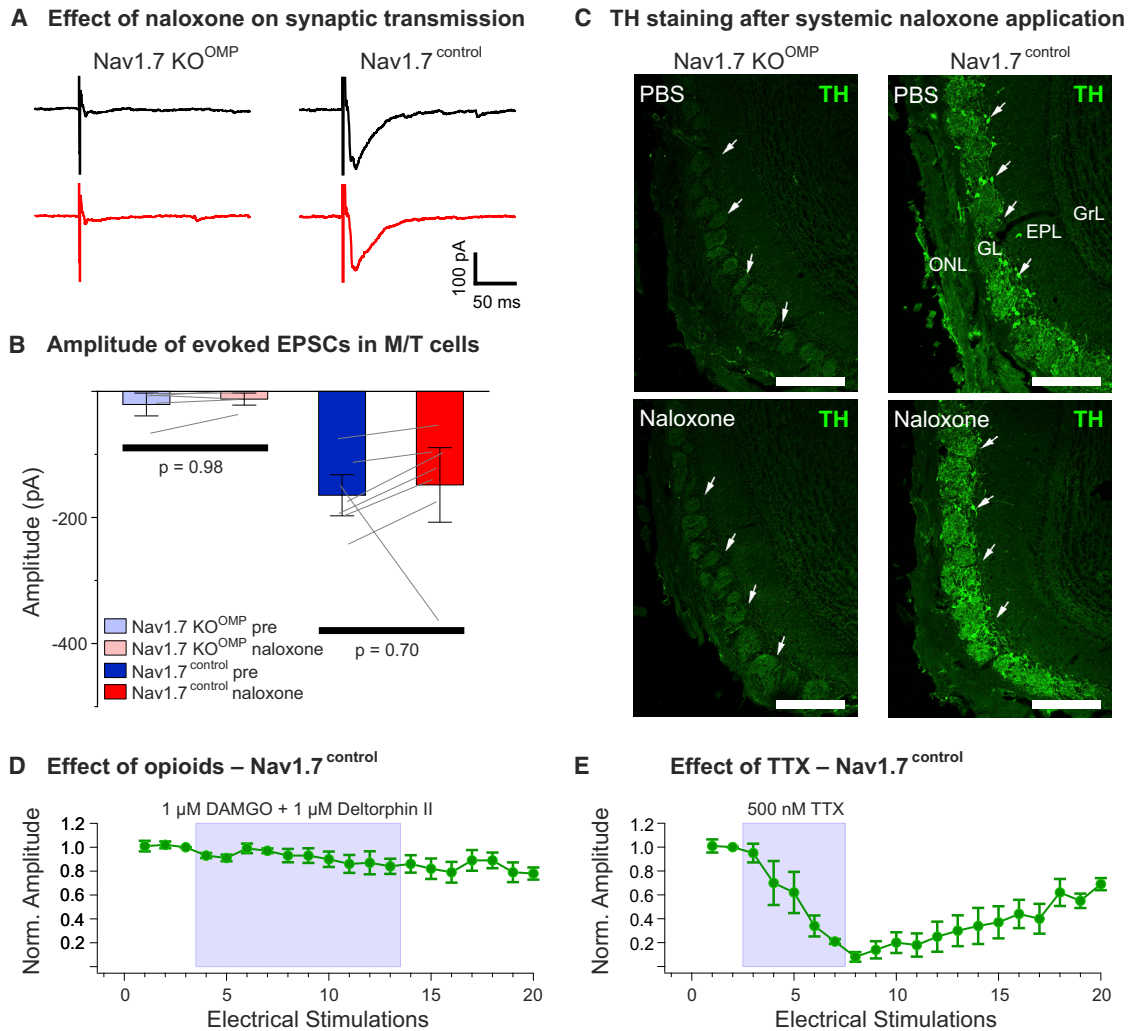

**Figure 7. Opioid receptor blockade does not rescue synaptic transmission in mice lacking Nav<sub>v</sub>1.7 in olfactory sensory neurons**

(A) Loss of synaptic transmission onto M/T cells in olfactory bulb slices of Nav<sub>v</sub>1.7 KO<sup>OMP</sup> mice after olfactory sensory neuron nerve stimulation cannot be rescued by 300 μM naloxone (left, red trace). Additionally, 300 μM naloxone does not affect M/T EPSCs to presynaptic nerve stimulation in control mice (right, red trace).

(B) Summary plot showing that the morphine receptor antagonist naloxone (300 μM) does not affect EPSC amplitudes in M/T cells after presynaptic nerve stimulation in Nav<sub>v</sub>1.7 KO<sup>OMP</sup> (KO<sup>OMP</sup> pre and naloxone, n = 17 from 5 animals) or in control mice (pre and naloxone, n = 7 from 4 animals). Error bars represent SEM. Means were compared using paired t test.

(C) Confocal images of tyrosine hydroxylase (TH) immunostaining (green) in coronal cryosections of the main olfactory bulb (MOB) following systemic administration of PBS or naloxone of adult Nav<sub>v</sub>1.7 KO<sup>OMP</sup> (left) and control (right) mice. TH staining is absent in the glomerular layer (GL) of Nav<sub>v</sub>1.7 KO<sup>OMP</sup> mice independent of treatment (arrows), whereas the MOB of control mice shows robust TH labeling of neuronal processes and periglomerular cell somata (arrows). There is no difference in TH staining in control MOB when comparing PBS versus naloxone administration. ONL, olfactory nerve layer; EPL, external plexiform layer; GrL, granule cell layer. Scale bars, 200 μm.

(D) Time course showing that treatment with 1 μM DAMGO and 1 μM deltorphin II does not affect M/T cell EPSCs evoked by olfactory nerve stimulation (n = 4). Normalized EPSC peak amplitudes are plotted as a function of the number of electrical ONL stimulations (1-min intervals). Error bars represent SEM.

(E) Time course showing that treatment with 500 nM TTX completely and reversibly abolishes M/T cell EPSCs evoked by ONL stimulation (n = 4). Error bars represent standard error of the mean.

no effect on withdrawal latencies in WT or KO<sup>Adv</sup> mice, indicating that peripheral opioid receptors are dispensable for analgesia linked to Nav<sub>v</sub>1.7 loss of function (Figure 8C). In contrast, systemic injection of naloxone (2 mg/kg) caused a 71% reversal of analgesia in the KO<sup>Adv</sup> group. Thus, central, but not peripheral, opioid receptors are essential for maintenance of analgesia in mice lacking Nav<sub>v</sub>1.7.

We have shown before that naloxone infusion restored nociception in a single rare female Nav<sub>v</sub>1.7-null human (Minett et al., 2015). Here we extended these findings to two male humans with compound heterozygous Nav<sub>v</sub>1.7 loss-of-function mutations (Table S1; McDermott et al., 2019; Ramirez et al., 2014; Shaikh et al., 2018). We applied tonic radiant heat stimuli (25 s) to the forearm while participants rated the perceived intensity online

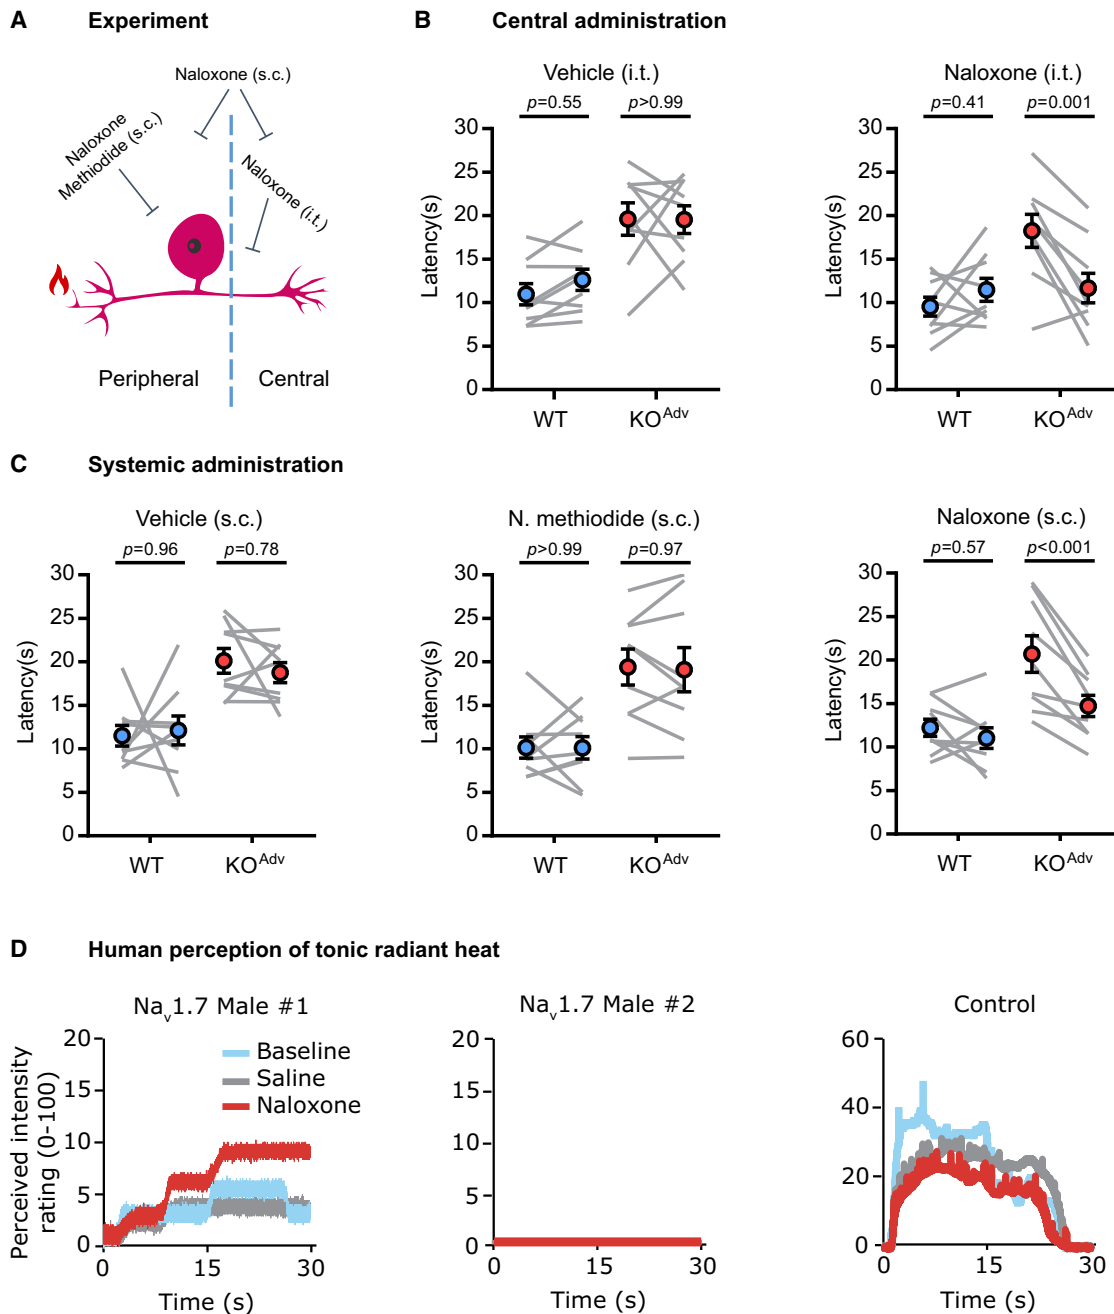

**Figure 8. Blocking central opioid receptors reverses analgesia in mice and humans lacking  $Na_V1.7$**

(A) Schematic of the behavioral pharmacology experiment.

(B) Behavioral assessment of the effect of vehicle and the opioid receptor blocker naloxone (3 mM in 5  $\mu$ L for 20 min) administered centrally by intrathecal injection.

(C) Behavioral assessment of the effect of vehicle and the opioid receptor blockers naloxone (2 mg/kg for 20 min) and naloxone methiodide (N. methiodide; 2 mg/kg for 20 min) administered systemically by subcutaneous injection. N. methiodide is peripherally restricted and does not cross the blood-brain barrier.

(D) Line plots showing the reported, perceived intensity of tonic, radiant heat stimuli (45°C–48°C) in two newly reported male  $Na_V1.7$ -null individuals and one control participant, at baseline, during saline administration and after treatment with naloxone (12 mg). Naloxone appears to increase heat sensitivity in one  $Na_V1.7$ -null participant (male 1), replicating previous observations in a single female null participant (Minett et al., 2015). Naloxone had no effect in a second  $Na_V1.7$ -null participant (male 2). The control participant shows higher perceived pain intensity, which is not enhanced by naloxone.

For (B) and (C), the error bars represent standard error of the mean. Mean latencies before and after drug treatment were compared using repeated-measures two-way ANOVA followed by post hoc Sidak's test.  $n = 9$  animals for WT and  $n = 9$  animals for  $KO^{Adv}$ .

See also Figure S6 and Table S1.

using a visual analog scale (Figure 8D). In male 1, naloxone strongly enhanced pain sensation, mimicking the effect on the previously reported female participant (Minett et al., 2015). In male 2, there was no apparent effect of naloxone. In an age- and gender-matched control individual, pain ratings were consistently higher than in the  $Na_v1.7$ -null individuals and not enhanced by naloxone. Thus, in 2 of the 3 humans with  $Na_v1.7$ -null mutations we tested so far, blockade of opioid receptors enhances pain sensitivity, supporting a role of opioid signaling in driving analgesia associated with  $Na_v1.7$  loss of function.

## DISCUSSION

Deletion of *SCN9A* encoding the peripheral sodium channel  $Na_v1.7$  in humans causes pain insensitivity and anosmia (Cox et al., 2006; Weiss et al., 2011). Peripheral neuron  $Na_v1.7$  KO mice are pain free in assays of mechanical, heat, and inflammatory pain and show decreased spinal cord wide-dynamic-range neuron firing to noxious stimuli (Minett et al., 2012; Nassar et al., 2004). The main driver of analgesia must thus be loss of  $Na_v1.7$  in sensory neurons rather than the CNS. Because  $Na_v1.7$  exhibits slow closed-state inactivation, the channel is less likely to inactivate during slow sub-threshold depolarizations.  $Na_v1.7$  therefore mediates a ramp current that is hypothesized to amplify noxious stimulus-induced generator potentials to trigger action potential firing at nociceptor peripheral terminals (Cummins et al., 1998). In patch-clamp studies of cultured mouse sensory neurons and human induced pluripotent stem cell (iPSC)-derived nociceptors under certain recording conditions,  $Na_v1.7$  deletion impairs action potential firing upon depolarization of the soma (McDermott et al., 2019; Shields et al., 2018). Recording of compound action potentials in  $KO^{Adv}$  mice also suggests some deficits in peripheral excitability (Hoffmann et al., 2018). Hence, the prevailing hypothesis and rationale for developing peripherally targeted inhibitors is that analgesia after  $Na_v1.7$  loss of function arises from reduced excitability of the nociceptor peripheral terminal.

Using *in vivo* imaging and electrophysiology, we directly tested whether loss of  $Na_v1.7$  causes peripheral silencing of nociceptors in live mice. To our surprise, nociceptor excitability at the level of the dorsal root ganglion (DRG) was largely unchanged, with normal levels of heat, polymodal and silent nociceptors, and normal calcium and spike response profiles. A hallmark of CIP associated with  $Na_v1.7$  loss of function is painless burns, but DRG responses to an unequivocally noxious heat stimulus (55°C) were unaffected by  $Na_v1.7$  deletion. Moreover, we observed intact peripheral sensitization of nociceptor activity following inflammatory mediator injection in  $Na_v1.7$  KO mice despite sensitization of behavioral responses to the same treatment being abolished. Nonetheless, we did find reduced numbers of cells responding to noxious mechanical stimuli, consistent with earlier *in vitro* recordings that found that ~30% of  $Na_v1.7$ -deficient putative nociceptors are electrically silenced in culture (Raouf et al., 2012). In the main, however, action potentials propagate as far as the soma in  $Na_v1.7$ -deleted sensory neurons, indicating that the locus of analgesia is unlikely to lie

at the peripheral terminal, explaining the failure of peripherally targeted inhibitors of  $Na_v1.7$  to relieve pain (Kingwell, 2019).

Studies of humans with loss-of-function mutations in  $Na_v1.7$  posit die-back of peripheral nerves as a significant mechanism of analgesia (Marchi et al., 2018; McDermott et al., 2019; Nilsen et al., 2009). In three human  $Na_v1.7$ -null individuals, microneurographic recordings found evidence of  $A\delta$  but not C fibers, based on activity-dependent slowing profiles (McDermott et al., 2019). These subjects were not challenged with painful stimuli. Nociceptors encompass all classes of sensory fibers, including  $A\beta$  fibers, and are defined by their ability to respond to and encode noxious stimuli (Emery and Wood, 2019; Lawson et al., 2019). Preservation of neurogenic inflammation combined with a case report of a child with normal epidermal innervation and loss of pain are inconsistent with neuropathy as the principal mechanism of analgesia (Klein et al., 2013; McDermott et al., 2019).  $Na_v1.7$ -null individuals also lose the channel from innocuous touch-sensing neurons that function normally and do not seem to die back (Zeisel et al., 2018).

$Na_v1.7$  is expressed along the length of sensory neurons, including at the central terminal, where it associates with many proteins, including synaptotagmin-2 (Black et al., 2012; Kanellopoulos et al., 2018). Given normal peripheral excitability but reduced spinal cord neuron firing in  $Na_v1.7$  KOs, an alternative analgesic mechanism is that nociceptive input is lost through failure of synaptic transmission from nociceptors to CNS neurons. Indeed, application of  $Na_v1.7$  inhibitors to spinal cord slices reduces synaptic transmission from afferents (Alexandrou et al., 2016; Deuis et al., 2017). Using glutamate imaging and electrophysiology, we observed deficits in pain-related neurotransmitter release in the spinal cord of mice lacking  $Na_v1.7$ . Although stimulus current thresholds for evoked glutamate release were generally in the C-fiber range for WT animals, unnaturally high stimulus intensities were often required to elicit any release in KOs, consistent with the increased sensory thresholds for reflexive withdrawal behavior seen in these animals. Because we directly activated dorsal roots of spinal cord slices, the glutamate imaging experiments preclude any contribution of impaired peripheral excitability to the observed synaptic deficits. Echoing this, direct stimulation of dorsal roots in one individual with CIP failed to elicit pain (Manfredi et al., 1981).

How does loss of  $Na_v1.7$  impair neurotransmitter release? Analgesia in mice and humans lacking  $Na_v1.7$  can be reversed substantially by opioid antagonists or opioid receptor deletion. This results from enhanced PENK production and opioid receptor signaling (Isensee et al., 2017; Minett et al., 2015; Pereira et al., 2018). Interestingly, regulation of *Penk* transcription and opioid receptor signaling has been linked to lowered sodium levels that may contribute to  $Na_v1.7$  loss-of-function analgesia (Isensee et al., 2017; Minett et al., 2015). Because opioids are known to potently suppress neurotransmitter release from spinal cord afferent terminals, we wondered whether the synaptic impairments we saw in  $Na_v1.7$  KOs are dependent on opioid receptors (Heinke et al., 2011; Yaksh et al., 1980). Peripheral excitability was unaffected by the opioid blocker naloxone in  $Na_v1.7$  KOs, consistent with previous findings using  $Na_v1.7$ -deficient iPSC-derived human nociceptors (McDermott et al., 2019). The deficits in glutamate transmission and WDR input

within the spinal cord were, however, reversed by naloxone.  $\mu$  and  $\delta$  opioid receptors are expressed at the central terminals in non-overlapping sets of nociceptors (Corder et al., 2017; Scherrer et al., 2009). This is consistent with our previous finding that combined genetic deletion or pharmacological blockade of  $\mu$  and  $\delta$ , but not  $\kappa$ , opioid receptors is required to reverse  $\text{Na}_v1.7$ -null analgesia (Pereira et al., 2018). Interestingly, met-enkephalin levels are also increased in the dorsal horn of  $\text{Na}_v1.7$  KO mice (Minett et al., 2015).

Anosmia in  $\text{Na}_v1.7$  nulls is wholly explained by impaired synaptic transmission from first-order olfactory sensory neurons, although somatic excitability to odorant stimuli is normal (Weiss et al., 2011). We found that synaptic transmission from olfactory sensory neurons was not rescued by naloxone treatment. This is not surprising, given that olfactory sensory neurons do not express opioid receptors (Saraiva et al., 2015).  $\text{Na}_v1.7$  is the only sodium channel available in olfactory sensory neuron nerve terminals; thus, its loss completely blocks electrical activity presynaptically, consistent with abolition of transmitter release by TTX (Ahn et al., 2011; Weiss et al., 2011). In contrast, nociceptors express other sodium channels that can support synaptic transmission in the absence of  $\text{Na}_v1.7$  when the inhibitory effect of opioids is removed (Medvedeva et al., 2009; Vysokov et al., 2019).

Opioid action at the central terminal is causally involved in pain insensitivity because central administration of naloxone was sufficient to substantially reverse analgesia but systemic administration of a peripherally restricted opioid antagonist was not. In humans, naloxone infusion enhanced sensitivity to nociceptive stimuli in 2 of the 3  $\text{Na}_v1.7$ -null individuals tested so far. Why did naloxone have no effect on heat sensitivity in male 2? This participant is hyposensitive to warmth and cooling. Interestingly, during adolescence he developed the ability to avoid injury by detecting a “tingling” sensation when exposed to noxious thermal and mechanical stimuli (Ramirez et al., 2014). In an experimental setting, the reported intensity of tingling encoded the strength of the stimulus for temperatures above 42°C but was never perceived as unpleasant. These unusual phenotypic characteristics could affect his perception of the tonic heat stimulus used here, which he rated as zero throughout. Importantly, numerous early case reports in the clinical literature attest to the dependence of CIP-like phenotypes on the opioid system, whilst sodium channel blockers show synergistic analgesia when paired with opioid drugs (Dehen et al., 1977; Kolesnikov et al., 2000; Vetter et al., 2017). In one particularly elegant experiment, intrathecal injection of cerebrospinal fluid (CSF) from an unmapped individual with CIP reduced heat nociception in rats. Because this effect was blocked by naloxone, CSF opioids acting centrally are sufficient to recapitulate some CIP-associated analgesia in animals (Fabbri et al., 1984).

What are the implications of a central, opioid-dependent mechanism of analgesia for pain therapies targeting  $\text{Na}_v1.7$ ? According to recent single-cell RNA sequencing studies,  $\text{Na}_v1.7$  is expressed widely in all sensory neuron subtypes, apart from proprioceptors (Zeisel et al., 2018). However, mice and humans lacking  $\text{Na}_v1.7$  are insensitive only to noxious stimuli. If  $\text{Na}_v1.7$  deletion results in electrical silencing of sensory neurons, then why is touch sensation not lost? Single-cell RNA sequencing data show that

opioid receptors are not expressed by neurons expressing markers for low-threshold mechanoreceptors (Zeisel et al., 2018). We suggest that only in cells expressing opioid receptors can  $\text{Na}_v1.7$  deletion drive impaired synaptic transmission by enhancing opioid receptor signaling. Importantly, deletion of the transcription factor NFAT5 leads to elevated *Penk* mRNA transcripts with no analgesia (Pereira et al., 2018). Enhanced opioid receptor signaling is therefore a crucial component of analgesia in  $\text{Na}_v1.7$  KO mice. This is consistent with recent observations that peptide antagonists of  $\text{Na}_v1.7$  that elicit analgesia in mice can be inhibited by naloxone (Chen et al., 2018; Mueller et al., 2019). Profound analgesic synergy between  $\text{Na}_v1.7$  blockers and low-dose opioids has also been reported (Deuis et al., 2017; Emery et al., 2016a).  $\text{Na}_v1.7$  blockade sensitizes opioid signaling only in nociceptors, reducing the effective concentration of opioids required to inhibit synaptic transmission from terminals. Close to 100% channel blockade may be required to drive the changes in opioid function responsible for analgesia (Minett et al., 2015). For intractable chronic pain, gene therapy strategies that mimic genetic loss of function will likely be required (Moreno et al., 2021).

These data support a mechanism where pain insensitivity of mice and humans lacking  $\text{Na}_v1.7$  principally involves opioid signaling (Figure S6). In contrast, anosmia in  $\text{Na}_v1.7$  null mutants is opioid independent. Diminished peripheral excitability and die-back may also contribute to analgesia, but opioid-mediated suppression of neurotransmitter release plays a major role. Interestingly, a combination of highly specific  $\text{Na}_v1.7$  antagonists and opioids causes potent analgesia in mice, whereas each component is inactive alone (Deuis et al., 2017; Mueller et al., 2019). Endogenous opioids inhibit synaptic communication between the central terminals of peripheral nociceptors and post-synaptic neurons in the spinal cord, resulting in diminished nociceptive input to the CNS. Other mechanisms may contribute to  $\text{Na}_v1.7$  analgesia to a lesser extent. For example, dorsal horn neuron-intrinsic excitability is also reduced in  $\text{Na}_v1.7$ -null mice through lack of transfer of the channel from primary afferent neurons to dorsal horn neurons (Alles et al., 2020). In addition, studies of hypothalamic neurons have shown the ability of  $\text{Na}_v1.7$  to integrate small depolarizations over long time periods to produce action potentials, a potentially significant mechanism still unexplored in nociceptive neurons (Branco et al., 2016).

We have demonstrated that nociceptor activity at the level of the DRG is largely unaffected by  $\text{Na}_v1.7$  deletion despite behavioral analgesia. The critical locus of analgesia in  $\text{Na}_v1.7$  nulls is therefore the central terminal and not, as thought previously, the periphery. Our findings consequently provide a biological explanation for the failure of peripherally targeted  $\text{Na}_v1.7$  inhibitors to cause analgesia and point to central terminal  $\text{Na}_v1.7$  and associated opioid signaling pathways as alternative therapeutic targets for pain relief.

## STAR★METHODS

Detailed methods are provided in the online version of this paper and include the following:

- KEY RESOURCES TABLE

- RESOURCE AVAILABILITY
  - Lead contact
  - Materials availability
  - Data and code availability
- EXPERIMENTAL MODEL AND SUBJECT DETAILS
  - Animals
  - Human subjects
- METHOD DETAILS
  - Viral injections
  - *In Vivo* Calcium Imaging
  - Behavioral Testing
  - Electrophysiology
  - Glutamate Imaging
  - Immunohistochemistry
  - Human Sensory Testing
- QUANTIFICATION AND STATISTICAL ANALYSIS

#### SUPPLEMENTAL INFORMATION

Supplemental information can be found online at <https://doi.org/10.1016/j.neuron.2021.03.012>.

#### ACKNOWLEDGMENTS

We thank the Wellcome Trust (200183/Z/15/Z) and the MRC. D.I.M. was supported by a PhD fellowship from the Wolfson Foundation. S.S. is a Versus Arthritis fellow and lecturer in sensory biology, and Versus Arthritis supported A.P.L., Q.M., and J.N.W. with a program grant (20200). F.Z. was supported by Deutsche Forschungsgemeinschaft grants Sonderforschungsbereich 894/A17 and Sonderforschungsbereich Transregio TRR 152/P10, project 239283807. R.M.B. was supported by Wellcome grant 110193 and Brain Research UK. We thank Xinzhong Dong for Pirt-GCaMP3 mice, Sonia Santana-Varela for help with mouse colonies, and Marco Beato and Filipe Nascimento and members of the Molecular Nociception Group for help and advice.

#### AUTHOR CONTRIBUTIONS

The study was conceived by D.I.M., E.C.E., and J.N.W. Imaging experiments were carried out by D.I.M., A.P.L., and E.C.E. and electrophysiology by S.S., A.P.L., D.I.M., and S.R.A.A. Neurotransmitter release assays were carried out by D.I.M., Q.M., M.A., and R.M.B. Olfaction studies were carried out by J.W., M.P., and F.Z. Behavioral assays were carried out by D.I.M., A.P.L., and Q.M. Human studies were carried out by F.M. and G.D.I. J.Z. and J.J.C. provided reagents and advice. The paper was written by D.I.M. and J.N.W. with contributions from all authors.

#### DECLARATION OF INTERESTS

The authors declare no competing interests.

Received: December 27, 2019

Revised: February 5, 2020

Accepted: March 8, 2021

Published: April 5, 2021

#### REFERENCES

Ahn, H.S., Black, J.A., Zhao, P., Tyrrell, L., Waxman, S.G., and Dib-Hajj, S.D. (2011). Nav1.7 is the predominant sodium channel in rodent olfactory sensory neurons. *Mol. Pain* 7, 32.

Alexandrou, A.J., Brown, A.R., Chapman, M.L., Estacion, M., Turner, J., Mis, M.A., Wilbrey, A., Payne, E.C., Gutteridge, A., Cox, P.J., et al. (2016). Subtype-selective small molecule inhibitors reveal a fundamental role for Nav1.7 in nociceptor electrogenesis, axonal conduction and presynaptic release. *PLoS ONE* 11, e0152405.

Alles, S.R.A., Nascimento, F., Luján, R., Luiz, A.P., Millet, Q., Bangash, M.A., Santana-Varela, S., Zhou, X., Cox, J.J., Okorokov, A.L., et al. (2020). Sensory neuron-derived Nav1.7 contributes to dorsal horn neuron excitability. *Sci. Adv.* 6, eaax4568.

Black, J.A., Frézel, N., Dib-Hajj, S.D., and Waxman, S.G. (2012). Expression of Nav1.7 in DRG neurons extends from peripheral terminals in the skin to central preterminal branches and terminals in the dorsal horn. *Mol. Pain* 8, 82.

Bolz, F., Kasper, S., Bufe, B., Zufall, F., and Pysrki, M. (2017). Organization and plasticity of sodium channel expression in the mouse olfactory and vomeronasal epithelia. *Front. Neuroanat.* 11, 28.

Branco, T., Tozer, A., Magnus, C.J., Sugino, K., Tanaka, S., Lee, A.K., Wood, J.N., and Stenison, S.M. (2016). Near-Perfect Synaptic Integration by Nav1.7 in Hypothalamic Neurons Regulates Body Weight. *Cell* 165, 1749–1761.

Breivik, H., Collett, B., Ventafridda, V., Cohen, R., and Gallacher, D. (2006). Survey of chronic pain in Europe: prevalence, impact on daily life, and treatment. *Eur. J. Pain* 10, 287–333.

Brenner, D.S., Golden, J.P., and Gereau, R.W., 4th (2012). A novel behavioral assay for measuring cold sensation in mice. *PLoS ONE* 7, e39765.

Chaplan, S.R., Bach, F.W., Pogrel, J.W., Chung, J.M., and Yaksh, T.L. (1994). Quantitative assessment of tactile allodynia in the rat paw. *J. Neurosci. Methods* 53, 55–63.

Chen, T.-W., Wardill, T.J., Sun, Y., Pulver, S.R., Renninger, S.L., Baohan, A., Schreier, E.R., Kerr, R.A., Orger, M.B., Jayaraman, V., et al. (2013). Ultrasensitive fluorescent proteins for imaging neuronal activity. *Nature* 499, 295–300.

Chen, C., Xu, B., Shi, X., Zhang, M., Zhang, Q., Zhang, T., Zhao, W., Zhang, R., Wang, Z., Li, N., and Fang, Q. (2018). GpTx-1 and [Ala<sup>5</sup>, Phe<sup>6</sup>, Leu<sup>26</sup>, Arg<sup>28</sup>] GpTx-1, two peptide Nav<sub>v</sub>1.7 inhibitors: analgesic and tolerance properties at the spinal level. *Br. J. Pharmacol.* 175, 3911–3927.

Churyukanov, M., Plaghki, L., Legrain, V., and Mouraux, A. (2012). Thermal detection thresholds of Aδ- and C-fibre afferents activated by brief CO<sub>2</sub> laser pulses applied onto the human hairy skin. *PLoS ONE* 7, e35817.

Corder, G., Tawfik, V.L., Wang, D., Sypek, E.I., Low, S.A., Dickinson, J.R., Sotoudeh, C., Clark, J.D., Barres, B.A., Bohlen, C.J., and Scherrer, G. (2017). Loss of μ opioid receptor signaling in nociceptors, but not microglia, abrogates morphine tolerance without disrupting analgesia. *Nat. Med.* 23, 164–173.

Cox, J.J., Reimann, F., Nicholas, A.K., Thornton, G., Roberts, E., Springell, K., Karbani, G., Jafri, H., Mannan, J., Raashid, Y., et al. (2006). An SCN9A channelopathy causes congenital inability to experience pain. *Nature* 444, 894–898.

Cummins, T.R., Howe, J.R., and Waxman, S.G. (1998). Slow closed-state inactivation: a novel mechanism underlying ramp currents in cells expressing the hNE/PN1 sodium channel. *J. Neurosci.* 18, 9607–9619.

Danielian, P.S., Muccino, D., Rowitch, D.H., Michael, S.K., and McMahon, A.P. (1998). Modification of gene activity in mouse embryos in utero by a tamoxifen-inducible form of Cre recombinase. *Curr. Biol.* 8, 1323–1326.

Dehen, H., Willer, J.C., Boureau, F., and Cambier, J. (1977). Congenital insensitivity to pain, and endogenous morphine-like substances. *Lancet* 2, 293–294.

Deuis, J.R., Dekan, Z., Wingerd, J.S., Smith, J.J., Munasinghe, N.R., Bhola, R.F., Imlach, W.L., Herzig, V., Armstrong, D.A., Rosengren, K.J., et al. (2017). Pharmacological characterisation of the highly Nav<sub>v</sub>1.7 selective spider venom peptide Pn3a. *Sci. Rep.* 7, 40883.

Emery, E.C., and Wood, J.N. (2019). Somatosensation a la mode: plasticity and polymodality in sensory neurons. *Curr. Opin. Physiol.* 11, 29–34.

Emery, E.C., Luiz, A.P., and Wood, J.N. (2016a). Nav1.7 and other voltage-gated sodium channels as drug targets for pain relief. *Expert Opin. Ther. Targets* 20, 975–983.

Emery, E.C., Luiz, A.P., Sikandar, S., Magnúsdóttir, R., Dong, X., and Wood, J.N. (2016b). In vivo characterization of distinct modality-specific subsets of somatosensory neurons using GCaMP. *Sci. Adv.* 2, e1600990.

Fabbri, A., Fraioli, F., Cruccu, G., Manfredi, M., Pert, C.B., and Pert, A. (1984). Intracerebroventricular injection of cerebrospinal fluid (CSF) from a patient

- with congenital indifference to pain induces analgesia in rats. *Experientia* 40, 1365–1366.
- Faber, C.G., Hoeijmakers, J.G.J., Ahn, H.-S., Cheng, X., Han, C., Choi, J.-S., Estacion, M., Lauria, G., Vanhoutte, E.K., Gerrits, M.M., et al. (2012). Gain of function Nav1.7 mutations in idiopathic small fiber neuropathy. *Ann. Neurol.* 71, 26–39.
- Fertleman, C.R., Baker, M.D., Parker, K.A., Moffatt, S., Elmslie, F.V., Abrahamson, B., Ostman, J., Klugbauer, N., Wood, J.N., Gardiner, R.M., and Rees, M. (2006). SCN9A mutations in paroxysmal extreme pain disorder: allelic variants underlie distinct channel defects and phenotypes. *Neuron* 52, 767–774.
- Gingras, J., Smith, S., Matson, D.J., Johnson, D., Nye, K., Couture, L., Feric, E., Yin, R., Moyer, B.D., Peterson, M.L., et al. (2014). Global Nav1.7 knockout mice recapitulate the phenotype of human congenital indifference to pain. *PLoS ONE* 9, e105895.
- Hargreaves, K., Dubner, R., Brown, F., Flores, C., and Joris, J. (1988). A new and sensitive method for measuring thermal nociception in cutaneous hyperalgesia. *Pain* 32, 77–88.
- Heinke, B., Gingl, E., and Sandkühler, J. (2011). Multiple targets of  $\mu$ -opioid receptor-mediated presynaptic inhibition at primary afferent A $\delta$ - and C-fibers. *J. Neurosci.* 31, 1313–1322.
- Hoffmann, T., Sharon, O., Wittmann, J., Carr, R.W., Vyshnevskaya, A., Col, R., Nassar, M.A., Reeh, P.W., and Weidner, C. (2018). Nav1.7 and pain: contribution of peripheral nerves. *Pain* 159, 496–506.
- Isensee, J., Krahé, L., Moeller, K., Pereira, V., Sexton, J.E., Sun, X., Emery, E., Wood, J.N., and Hucho, T. (2017). Synergistic regulation of serotonin and opioid signaling contributes to pain insensitivity in Nav1.7 knockout mice. *Sci. Signal.* 10, eaah4874.
- Kanellopoulos, A.H., Koenig, J., Huang, H., Pyrski, M., Millet, Q., Lolignier, S., Morohashi, T., Gossage, S.J., Jay, M., Linley, J.E., et al. (2018). Mapping protein interactions of sodium channel Nav1.7 using epitope-tagged gene-targeted mice. *EMBO J.* 37, 427–445.
- Kim, Y.S., Chu, Y., Han, L., Li, M., Li, Z., LaVinka, P.C., Sun, S., Tang, Z., Park, K., Caterina, M.J., et al. (2014). Central terminal sensitization of TRPV1 by descending serotonergic facilitation modulates chronic pain. *Neuron* 81, 873–887.
- Kingwell, K. (2019). Nav1.7 withholds its pain potential. *Nat. Rev. Drug Discov.* 18, 321–323.
- Klein, C.J., Wu, Y., Kilfoyle, D.H., Sandroni, P., Davis, M.D., Gavriloiva, R.H., Low, P.A., and Dyck, P.J. (2013). Infrequent SCN9A mutations in congenital insensitivity to pain and erythromelalgia. *J. Neurol. Neurosurg. Psychiatry* 84, 386–391.
- Kolesnikov, Y.A., Chereshev, I., and Pasternak, G.W. (2000). Analgesic synergy between topical lidocaine and topical opioids. *J. Pharmacol. Exp. Ther.* 295, 546–551.
- Lawson, S.N., Fang, X., and Djouhri, L. (2019). Nociceptor subtypes and their incidence in rat lumbar dorsal root ganglia (DRGs): focussing on C-polymodal nociceptors, A $\beta$ -nociceptors, moderate pressure receptors and their receptive field depths. *Curr. Opin. Physiol.* 11, 125–146.
- Legrain, V., Iannetti, G.D., Plaghki, L., and Mouraux, A. (2011). The pain matrix reloaded: a salience detection system for the body. *Prog. Neurobiol.* 93, 111–124.
- Manfredi, M., Bini, G., Cruccu, G., Accornero, N., Berardelli, A., and Medolago, L. (1981). Congenital absence of pain. *Arch. Neurol.* 38, 507–511.
- Marchi, M., Provitera, V., Nolano, M., Romano, M., Maccora, S., D’Amato, I., Salvi, E., Gerrits, M., Santoro, L., and Lauria, G. (2018). A novel SCN9A splicing mutation in a compound heterozygous girl with congenital insensitivity to pain, hyposmia and hypogeusia. *J. Peripher. Nerv. Syst.* 23, 202–206.
- Marvin, J.S., Borghuis, B.G., Tian, L., Cichon, J., Harnett, M.T., Akerboom, J., Gordus, A., Renninger, S.L., Chen, T.-W., Bargmann, C.I., et al. (2013). An optimized fluorescent probe for visualizing glutamate neurotransmission. *Nat. Methods* 10, 162–170.
- McDermott, L.A., Weir, G.A., Themistocleous, A.C., Segerdahl, A.R., Blesneac, I., Baskozos, G., Clark, A.J., Millar, V., Peck, L.J., Ebner, D., et al. (2019). Defining the Functional Role of Nav1.7 in Human Nociception. *Neuron* 101, 905–919.e8.
- Medvedeva, Y.V., Kim, M.S., Schnizler, K., and Usachev, Y.M. (2009). Functional tetrodotoxin-resistant Na<sup>+</sup> channels are expressed presynaptically in rat dorsal root ganglia neurons. *Neuroscience* 159, 559–569.
- Melo, H., Basso, L., Iftinca, M., MacNaughton, W.K., Hollenberg, M.D., McKay, D.M., and Altier, C. (2018). Itch induced by peripheral mu opioid receptors is dependent on TRPV1-expressing neurons and alleviated by channel activation. *Sci. Rep.* 8, 15551.
- Minett, M.S., Nassar, M.A., Clark, A.K., Passmore, G., Dickenson, A.H., Wang, F., Malcangio, M., and Wood, J.N. (2012). Distinct Nav1.7-dependent pain sensations require different sets of sensory and sympathetic neurons. *Nat. Commun.* 3, 791.
- Minett, M.S., Falk, S., Santana-Varela, S., Bogdanov, Y.D., Nassar, M.A., Heegaard, A.-M., and Wood, J.N. (2014). Pain without nociceptors? Nav1.7-independent pain mechanisms. *Cell Rep.* 6, 301–312.
- Minett, M.S., Pereira, V., Sikandar, S., Matsuyama, A., Lolignier, S., Kanellopoulos, A.H., Mancini, F., Iannetti, G.D., Bogdanov, Y.D., Santana-Varela, S., et al. (2015). Endogenous opioids contribute to insensitivity to pain in humans and mice lacking sodium channel Nav1.7. *Nat. Commun.* 6, 8967.
- Moreno, A.M., Catroli, G.F., Alemán, F., Pla, A., Woller, S.A., Hu, M., Yaksh, T., and Mali, P. (2021). Long-lasting Analgesia via Targeted in vivo Epigenetic Repression of Nav1.7. *Sci Transl Med* 13, 1–14, <https://doi.org/10.1126/scitranslmed.aay9056>.
- Mueller, A., Starobova, H., Morgan, M., Dekan, Z., Cheneval, O., Schroeder, C.I., Alewood, P.F., Deuis, J.R., and Vetter, I. (2019). Antiallodynic effects of the selective Nav1.7 inhibitor Pn3a in a mouse model of acute postsurgical pain: evidence for analgesic synergy with opioids and baclofen. *Pain* 160, 1766–1780.
- Nassar, M.A., Stirling, L.C., Forlani, G., Baker, M.D., Matthews, E.A., Dickenson, A.H., and Wood, J.N. (2004). Nociceptor-specific gene deletion reveals a major role for Nav1.7 (PN1) in acute and inflammatory pain. *Proc. Natl. Acad. Sci. USA* 101, 12706–12711.
- Nilsen, K.B., Nicholas, A.K., Woods, C.G., Mellgren, S.I., Nebuchennykh, M., and Aasly, J. (2009). Two novel SCN9A mutations causing insensitivity to pain. *Pain* 143, 155–158.
- Pereira, V., Millet, Q., Aramburu, J., Lopez-Rodriguez, C., Gaveriaux-Ruff, C., and Wood, J.N. (2018). Analgesia linked to Nav1.7 loss of function requires  $\mu$ - and  $\delta$ -opioid receptors. *Wellcome Open Res.* 3, 101.
- Ramirez, J.D., Habib, A.M., Cox, J.J., Themistocleous, A.C., McMahon, S.B., Wood, J.N., and Bennett, D.L.H. (2014). Null mutation in SCN9A in which noxious stimuli can be detected in the absence of pain. *Neurology* 83, 1577–1580.
- Randall, L.O., and Selitto, J.J. (1957). A method for measurement of analgesic activity on inflamed tissue. *Arch. Int. Pharmacodyn. Ther.* 111, 409–419.
- Raouf, R., Rugiero, F., Kiesewetter, H., Hatch, R., Hummler, E., Nassar, M.A., Wang, F., and Wood, J.N. (2012). Sodium channels and mammalian sensory mechanotransduction. *Mol. Pain* 8, 21.
- Saraiva, L.R., Ibarra-Soria, X., Khan, M., Omura, M., Scialdone, A., Mombaerts, P., Marioni, J.C., and Logan, D.W. (2015). Hierarchical deconstruction of mouse olfactory sensory neurons: from whole mucosa to single-cell RNA-seq. *Sci. Rep.* 5, 18178.
- Scherrer, G., Imamachi, N., Cao, Y.Q., Contet, C., Mennicken, F., O’Donnell, D., Kieffer, B.L., and Basbaum, A.I. (2009). Dissociation of the opioid receptor mechanisms that control mechanical and heat pain. *Cell* 137, 1148–1159.
- Shaikh, S.S., Nahorski, M.S., Rai, H., and Woods, C.G. (2018). Before progressing from “exomes” to “genomes”... don’t forget splicing variants. *Eur. J. Hum. Genet.* 26, 1559–1562.
- Shields, S.D., Deng, L., Reese, R.M., Dourado, M., Tao, J., Foreman, O., Chang, J.H., and Hackos, D.H. (2018). Insensitivity to Pain upon Adult-Onset



- Deletion of Nav1.7 or Its Blockade with Selective Inhibitors. *J. Neurosci.* **38**, 10180–10201.
- Vetter, I., Deuis, J.R., Mueller, A., Israel, M.R., Starobova, H., Zhang, A., Rash, L.D., and Mobli, M. (2017). Nav1.7 as a pain target - From gene to pharmacology. *Pharmacol. Ther.* **172**, 73–100.
- Vysokov, N., McMahon, S.B., and Raouf, R. (2019). The role of Nav channels in synaptic transmission after axotomy in a microfluidic culture platform. *Sci. Rep.* **9**, 12915.
- Wang, F., Bélanger, E., Côté, S.L., Desrosiers, P., Prescott, S.A., Côté, D.C., and De Koninck, Y. (2018). Sensory Afferents Use Different Coding Strategies for Heat and Cold. *Cell Rep.* **23**, 2001–2013.
- Weiss, J., Pyrski, M., Jacobi, E., Bufe, B., Willnecker, V., Schick, B., Zizzari, P., Gossage, S.J., Greer, C.A., Leinders-Zufall, T., et al. (2011). Loss-of-function mutations in sodium channel Nav1.7 cause anosmia. *Nature* **472**, 186–190.
- Yaksh, T.L., Jessell, T.M., Gamse, R., Mudge, A.W., and Leeman, S.E. (1980). Intrathecal morphine inhibits substance P release from mammalian spinal cord in vivo. *Nature* **286**, 155–157.
- Yang, Y., Wang, Y., Li, S., Xu, Z., Li, H., Ma, L., Fan, J., Bu, D., Liu, B., Fan, Z., et al. (2004). Mutations in SCN9A, encoding a sodium channel alpha subunit, in patients with primary erythralgia. *J. Med. Genet.* **41**, 171–174.
- Zeisel, A., Hochgerner, H., Lönnerberg, P., Johnsson, A., Memic, F., van der Zwan, J., Häring, M., Braun, E., Borm, L.E., La Manno, G., et al. (2018). Molecular Architecture of the Mouse Nervous System. *Cell* **174**, 999–1014.e22.
- Zhou, X., Wang, L., Hasegawa, H., Amin, P., Han, B.X., Kaneko, S., He, Y., and Wang, F. (2010). Deletion of PIK3C3/Vps34 in sensory neurons causes rapid neurodegeneration by disrupting the endosomal but not the autophagic pathway. *Proc. Natl. Acad. Sci. USA* **107**, 9424–9429.

## STAR★METHODS

### KEY RESOURCES TABLE

| REAGENT or RESOURCE                                        | SOURCE                                 | IDENTIFIER                                                                                |
|------------------------------------------------------------|----------------------------------------|-------------------------------------------------------------------------------------------|
| <b>Bacterial and virus strains</b>                         |                                        |                                                                                           |
| pAAV.CAG.GCaMP6f.WPRE.SV40                                 | <a href="#">Chen et al., 2013</a>      | Addgene AAV1; 100836-AAV1                                                                 |
| pAAV.hSyn.iGluSnFr.WPRE.SV40                               | <a href="#">Marvin et al., 2013</a>    | Addgene AAV9; 98929-AAV9                                                                  |
| <b>Chemicals, peptides, and recombinant proteins</b>       |                                        |                                                                                           |
| PF 05089771                                                | Tocris                                 | 5931; CAS: 1430806-04-4                                                                   |
| Prostaglandin E2                                           | Merck (Sigma)                          | P0409; CAS: 363-24-6                                                                      |
| Naloxone hydrochloride dihydrate                           | Merck (Sigma)                          | N7758; CAS: 51481-60-8                                                                    |
| Naloxone Methiodide                                        | Merck (Sigma)                          | N129; CAS: 93302-47-7                                                                     |
| <b>Deposited data</b>                                      |                                        |                                                                                           |
| <i>In vivo</i> imaging and electrophysiology – Source Data | Mendeley Data                          | <a href="https://doi.org/10.17632/5cw99c3w8p.1">https://doi.org/10.17632/5cw99c3w8p.1</a> |
| <b>Experimental models: Organisms/strains</b>              |                                        |                                                                                           |
| Mouse: Pirt-GCaMP3                                         | <a href="#">Kim et al., 2014</a>       | N/A                                                                                       |
| Mouse: Na <sub>v</sub> 1.7 flox                            | <a href="#">Nassar et al., 2004</a>    | N/A                                                                                       |
| Mouse: Advillin Cre                                        | <a href="#">Zhou et al., 2010</a>      | N/A                                                                                       |
| Mouse: Wnt1 Cre                                            | <a href="#">Danielian et al., 1998</a> | N/A                                                                                       |
| Mouse: OMP Cre Na <sub>v</sub> 1.7 KO                      | <a href="#">Weiss et al., 2011</a>     | N/A                                                                                       |
| <b>Oligonucleotides</b>                                    |                                        |                                                                                           |
| Primers for mouse genotyping                               | See <a href="#">Table S2</a>           | N/A                                                                                       |
| <b>Software and algorithms</b>                             |                                        |                                                                                           |
| Fiji                                                       | ImageJ                                 | <a href="https://fiji.sc/">https://fiji.sc/</a>                                           |
| R studio                                                   | R                                      | <a href="https://rstudio.com/">https://rstudio.com/</a>                                   |
| LasX                                                       | Leica                                  | <a href="https://www.leica-microsystems.com/">https://www.leica-microsystems.com/</a>     |
| PrairieView                                                | Bruker                                 | <a href="https://www.bruker.com/en.html">https://www.bruker.com/en.html</a>               |
| pCLAMP                                                     | Molecular Devices                      | <a href="https://www.moleculardevices.com/">https://www.moleculardevices.com/</a>         |
| Prism                                                      | Graphpad                               | <a href="https://www.graphpad.com/">https://www.graphpad.com/</a>                         |

### RESOURCE AVAILABILITY

#### Lead contact

Further information and requests for resources and reagents should be directed to and will be fulfilled by the lead contact, John N. Wood ([j.wood@ucl.ac.uk](mailto:j.wood@ucl.ac.uk)).

#### Materials availability

This study did not generate any new unique reagents.

#### Data and code availability

Data are available from the lead contact on reasonable request. Source data for *in vivo* imaging and electrophysiology are deposited with Mendeley Data at <https://doi.org/10.17632/5cw99c3w8p.1>.

### EXPERIMENTAL MODEL AND SUBJECT DETAILS

#### Animals

All animal procedures carried out at University College London were approved by University College London ethical review committees and conformed to UK Home Office regulations. All animal procedures carried out at the University of Saarland were approved by the Institutional Animal Care and Use Committee of the University of Saarland (UdS) School of Medicine and were in accordance with the laws for animal experiments issued by the German Government.

The following mouse lines were used in this study: Advillin-Cre  $Na_v1.7$  KO, Wnt1-Cre  $Na_v1.7$  KO, Advillin-Cre  $Na_v1.7$  KO Pirt-GCaMP3, Wnt1-Cre  $Na_v1.7$  KO Pirt-GCaMP3 and OMP-Cre  $Na_v1.7$  KO. Breeding strategies were as previously described (Minett et al., 2012; Weiss et al., 2011). Peripheral  $Na_v1.7$  knockout mice expressing GCaMP3 were generated by crossing knockout animals with mice homozygous for floxed  $Na_v1.7$  and homozygous for Pirt-GCaMP3 (Kim et al., 2014). Mice were housed on a 12:12 hour light-dark cycle with food and water available *ad libitum*. For genotyping, genomic DNA was isolated from ear tissue or tail clip biopsy for PCR. Genotyping primers are summarized in Table S2. Both male and female animals were used for all experiments. Adult or late juvenile stage mice were used for all experiments, except for glutamate imaging studies which used tissue from animals pre-weaning, and specific age ranges for each experiment can be found in the Method details. The number of animals used to generate each dataset is described in individual figure legends.

### Human subjects

We tested two male  $Na_v1.7$  null participants (aged 32 and early 30 s) and one age and gender matched (33) healthy control. All participants gave written informed consent. The study was approved by the UCL Research Ethics Committee. Both males are compound heterozygous nulls and have been previously described (McDermott et al., 2019; Ramirez et al., 2014). Mutations are summarized in Table S2.

## METHOD DETAILS

### Viral injections

Neonatal pups (P1-P3) were injected with 5  $\mu$ l AAV1-CAG-GCaMP6f or AAV9-Synapsin-iGluSnFR via the intraperitoneal route using a Hamilton syringe connected to a 30G needle cannula. Care was taken to minimize exposure to foreign scents to ensure re-acceptance of pups by parents upon return to breeding cage.

### In Vivo Calcium Imaging

#### Acquisition

Mice expressing GCaMP3 or GCaMP6f (8 to 14 weeks, male and female) were anesthetized using ketamine (120 mg/kg) and medetomidine (1.2 mg/kg). Depth of anesthesia was confirmed by pedal reflex and breathing rate. Animals were maintained at a constant body temperature of 37°C using a heated mat (VetTech). Lateral laminectomy was performed at spinal level L3-5. In brief, the skin was incised longitudinally, and the paravertebral muscles were cut to expose the vertebral column. Transverse and superior articular processes of the vertebra were removed using microdissection scissors and OmniDrill 35 (WPI). To obtain a clear image of the sensory neuron cell bodies in the ipsilateral dorsal root ganglion (DRG), the dura mater and the arachnoid membranes were carefully opened using microdissection forceps. The animal was mounted onto a custom-made clamp attached to the vertebral column (L1), rostral to the laminectomy. The trunk of the animal was slightly elevated to minimize interference caused by respiration. Artificial cerebrospinal fluid [containing 120 mM NaCl, 3 mM KCl, 1.1 mM  $CaCl_2$ , 10 mM glucose, 0.6 mM  $NaH_2PO_4$ , 0.8 mM  $MgSO_4$ , 18 mM  $NaHCO_3$  (pH 7.4) with NaOH] was perfused over the exposed DRG during the procedure to maintain tissue integrity, or the DRG was isolated by coating with silicone elastomer.

Images were acquired using a Leica SP8 confocal microscope (Leica). GCaMP3 or GCaMP6f was excited using a 488 nm laser (1%–15% laser power). Images were acquired at 800Hz, with bidirectional laser scan. Typically, the pinhole was kept at 1 A.U., but in some experiments was increased to 1.5 A.U. to enhance brightness. Images magnification was between 0.75x and 3x optical zoom on a 10x air objective, depending on DRG anatomy. Noxious and innocuous stimuli were applied to the left hindpaw, ipsilateral to the exposed DRG. For thermal stimuli, the paw was immersed with ice-water (0°C) or water heated to 37°C or 55°C using a Pasteur pipette. For mechanical stimuli, we used noxious pinch with serrated forceps. PGE2 (500  $\mu$ M in saline) was applied to the paw by intraplantar injection. Naloxone (2 mg/kg in saline) was delivered by subcutaneous injection into the scruff of the neck.

#### Analysis

Image stacks were registered to the first frame in the series using the FIJI plugin TurboReg (accurate rigid body transformation) to correct for XY drift. Stacks that showed excessive Z movement were excluded from analysis. Regions of interest (ROI) were manually drawn around apparently responding cells using the free hand tool in FIJI. Mean pixel intensity over time for each ROI was extracted and analyzed. The time series of mean pixel intensity for each ROI was smoothed by a four time point moving average to remove high-frequency noise. Next, we calculated the derivative of the mean pixel intensity. We calculated a mean baseline derivative for the 10 s preceding stimulus application. Neurons were classed as responders if, within 30 s of stimulus application, the maximum derivative was greater than the baseline derivative plus five standard deviations – that is, a Z-score of at least 5. We then calculated the  $\Delta F/F_0$  value for each response to obtain a normalized measure of change in fluorescence. Neurons which showed a  $\Delta F/F_0$  less than 0.25 were then discarded. Each trace was then manually screened as a further precaution against false positives. The remaining neurons that made up the responding population were then used for statistical analysis.

### Behavioral Testing

All animal experiments were performed in accordance with Home Office Regulations. Observers were blinded to treatment and/or genotype. Animals were acclimatized to handling by the investigator and every effort was made to minimize stress during the testing. Both male and female animals were used.

### Randall Selitto

The threshold for mechanonociception was assessed using the Randall Selitto test (Randall and Selitto, 1957). Animals were restrained in a clear plastic tube. A 3 mm<sup>2</sup> blunt probe was applied to the tail of the animal with increasing pressure until the mouse exhibited a nocifensive response, such as tail withdrawal. The pressure required to elicit nocifensive behavior was averaged across three trials. The cut-off was 500 g.

### Von Frey

Punctate mechanical sensitivity was measured using the up-down method of Chaplan to obtain a 50% withdrawal threshold (Chaplan et al., 1994). Mice were habituated for one hour in darkened enclosures with a wire mesh floor. A 0.4 g Von Frey filament was applied to the plantar surface of the paw for 3 s. A positive response resulted in application of a filament of lesser strength on the following trial, and no response in application of a stronger filament. To calculate the 50% withdrawal threshold, five responses surrounding the 50% threshold were obtained after the first change in response. The pattern of responses was used to calculate the 50% threshold =  $(10[\chi + \kappa\delta])/10,000$ , where  $\chi$  is the log of the final von Frey filament used,  $\kappa$  = tabular value for the pattern of responses and  $\delta$  the mean difference between filaments used in log units. The log of the 50% threshold was used to calculate summary and test statistics, in accordance with Weber's Law.

### Hargreaves' Test:

Spinal reflex responses to noxious heat stimulation were assessed using the Hargreaves' test (Hargreaves et al., 1988). Mice were habituated for an hour in plexiglass enclosures with a glass base. Before testing, the enclosures were cleaned of faeces and urine. Radiant heat was then locally applied to the plantar surface of the hindpaw until the animal exhibited a nocifensive withdrawal response. Average latencies were obtained from three trials per animal, with inter-trial interval of 15 mins. Cut-off time was 30 s. The effect of intraplantar PGE2 (500  $\mu$ M) on heat sensitivity was assessed using the Hargreaves' test. A baseline withdrawal latency was obtained and then measured again 10 minutes following PGE2 treatment. The effect of subcutaneous opioid blockers (2 mg/kg for 20 minutes) or intrathecal naloxone (3 mM in 5  $\mu$ l) was also assessed using this assay, 20 minutes following drug treatment. For intrathecal injections, mice were anesthetized using 2%–3% isoflurane and drugs delivered via a 30G needle cannula attached to a Hamilton syringe.

### Cold Plantar

Spinal reflex responses to cooling were assessed using the Cold Plantar test (Brenner et al., 2012). Mice were placed in Plexiglass enclosures with glass flooring and acclimatized for one hour. Before testing, faeces and urine were removed and the animal was left to settle. Dry ice was compacted into a blunt 2 mL syringe and applied to the glass surface just below the hindpaw. The time to withdrawal was measured. Cut off was 30 s. Testing was repeated 3 times, and averaged, with a waiting period of 15min between stimulations.

## Electrophysiology

### In vitro electrophysiology

Mice were killed by inhalation of a rising CO<sub>2</sub> concentration followed by cervical dislocation to confirm death. Dorsal root ganglia were dissected and then digested in an enzyme mix for 45 minutes before mechanical trituration. Neurons were re-suspended in DMEM supplemented with nerve growth factor and plated onto 12 mm glass coverslips coated with poly-L-lysine/laminin.

Patch pipettes (tip resistance of 3–5 M $\Omega$ ) were filled with intracellular solution containing: 140 mM CsF, 1 mM EGTA, 5 mM NaCl and 10 mM HEPES. To isolate macroscopic sodium currents, neurons were continuously perfused with room temperature extracellular solution containing: 35 mM NaCl, 75 mM Choline-Cl, 30 mM TEA-Cl, 4 mM KCl, 1.8 mM CaCl<sub>2</sub>, 1 mM MgCl<sub>2</sub>, 10 mM HEPES, 5 mM Glucose and 0.1 mM CdCl<sub>2</sub>. Whole-cell recordings were obtained using an Axopatch 200B amplifier, filtered at 10 kHz and digitized at 50 kHz via a Digidata 1322A (Axon Instruments). Medium diameter neurons from WT and Na<sub>v</sub>1.7 KO mice were voltage-clamped at –70 mV. Series resistance compensation was at least 60%. To measure the voltage-dependence of sodium channel activation, the holding command was dropped to –120 mV to de-inactivate all sodium channels and then a step-protocol from –80 to 20 mV was applied, in increments of 5 mV, to activate sodium channels. To determine the contribution of Na<sub>v</sub>1.7 to the total sodium current, the Na<sub>v</sub>1.7 blocker PF 05089771 was applied for 5 minutes at 100  $\mu$ M. As PF 05089771 is a state-dependent blocker that binds only to the inactivated state of the channel, the holding command was increased to –40 mV to inactivate sodium channels for the duration of drug application.

### Ex vivo spinal cord slice electrophysiology

Spinal cord preparations were obtained from male or female mice, between 30 and 60 days old, from either wild-type C75Bl/6 (WT) or conditional Na<sub>v</sub>1.7 knockout (Na<sub>v</sub>1.7 KO). Animals were anesthetized via intraperitoneal injection of a ketamine/xylazine mix (80 mg/kg and 10 mg/kg respectively) and decapitated. The spinal cord was dissected in ice cold aCSF containing: 113 mM NaCl, 3 mM KCl, 25 mM NaHCO<sub>3</sub>, 1 mM NaH<sub>2</sub>PO<sub>4</sub>, 2 mM CaCl<sub>2</sub>, 2 mM MgCl<sub>2</sub>, and 11 mM D-glucose. Once dissected free from the vertebral column, the spinal cord was carefully cleaned from connective tissues and dorsal roots were cut at approximately 2 mm length. The spinal cord was then glued to an agar block and glued to the slicing chamber of a HM 650V vibratome (Microm, ThermoFisher Scientific, UK). The slicing solution contained: 130 mM K-gluconate, 15 mM KCl, 0.05 mM EGTA, 20 mM HEPES, 25 mM D-glucose, 3 mM kynurenic acid, 2 mM Na-Pyruvate, 3 mM Myo-Inositol, 1 mM Na-L-Ascorbate, and pH 7.4 with NaOH<sub>4</sub>. Slices were incubated for 40 minutes at 35 degrees and then allowed to equilibrate at room temperature for further 30 minutes before starting the recordings.

Voltage clamp recordings were performed using either a Molecular Devices Multiclamp 700B (Scientifica, UK) or an ELC-03X amplifier (NPI electronics, Germany). Signals were filtered at 5KHz, acquired at 50 KHz using a Molecular Devices 1440A A/D converter (Scientifica, UK) and recorded using Clampex 10 software (Molecular Devices, Scientifica, UK). Electrodes were pulled with a Flaming-Brown puller (P1000, Sutter Instruments, USA) from borosilicate thick glass (GC150F, Harvard Apparatus, UK). The resistance of the electrodes, following fire polishing of the tip, ranged between 3 and 5 M $\Omega$ . Bridge balance was applied to all recordings. Intracellular solution contained 125 mM K-gluconate, 6 mM KCl, 10 mM HEPES, 0.1 mM EGTA, 2 mM Mg-ATP, pH 7.3 with KOH, and osmolarity of 290–310 mOsm. Cells were targeted for patching in the inner and outer Lamina II and visualized through an Eclipse E600FN Nikon microscope (Nikon, Japan) equipped with infrared differential interference contrast (IR-DIC) connected to a digital camera (Nikon, DS-Qi1Mc). Cells were voltage-clamped at  $-70$  mV and spontaneous excitatory post synaptic currents (sEPSCs) recorded. sEPSCs were automatically detected using ClampFit in a 5 s window for each cell.

### **Ex vivo olfactory bulb electrophysiology**

Acute MOB slices were prepared from 4 - 11 week old mice (male and female) anesthetized with CO<sub>2</sub> before decapitation. OBs were rapidly dissected in ice-cold oxygenated (95% O<sub>2</sub>, 5% CO<sub>2</sub>) solution containing the following (in mM): 83 NaCl, 26.2 NaHCO<sub>3</sub>, 1 NaH<sub>2</sub>PO<sub>4</sub>, 2.5 KCl, 3.3 MgCl<sub>2</sub>, 0.5 CaCl<sub>2</sub>, 70 sucrose, pH 7.3 (osmolarity, 300 mOsm/l). The tissue was mounted on a vibratome (VT1000S; Leica Microsystems, Nussloch, Germany) and horizontal MOB slices (275  $\mu$ m thick) were cut in the same solution. Slices were stored at 30 - 35°C for 15 - 20 min in standard extracellular solution and afterward at room temperature until use. The extracellular solution contained the following (in mM): 125 NaCl, 25 NaHCO<sub>3</sub>, 2.5 KCl, 1.25 NaH<sub>2</sub>PO<sub>4</sub>, 1 MgCl<sub>2</sub>, 2 CaCl<sub>2</sub> and 10 glucose (continuously bubbled with 95% O<sub>2</sub>, 5% CO<sub>2</sub>). Tissue slices were placed in the recording chamber and superfused at a rate of  $\sim$ 2 ml/min (gravity flow) with extracellular solution bubbled with carbogen (95% O<sub>2</sub>, 5% CO<sub>2</sub>). Cells were visualized in intact tissue slices with a 40x water immersion objective lens (Olympus) using infrared-optimized differential interference contrast optics and fluorescent illumination and a GFP filter set attached to the microscope to elucidate the morphology of lucifer yellow-filled mitral and tufted cells (BX50WI, Olympus).

Slice recordings were carried out at room temperature using an EPC-9 automated patch-clamp amplifier (HEKA Elektronik, Lambrrecht, Germany) and Pulse 8.11 software as described previously (Weiss et al., 2011). Patch pipettes were pulled from borosilicate glass tubing (World Precision Instruments, Germany). The signals were filtered using an eight-pole Bessel filter built into the EPC-9 amplifier and digitized at a frequency  $\geq$  filter cut-off frequency (VR-10B, Instrutech Corp.). The sampling rate during all recordings was 10 kHz. Recording pipettes had resistances of 3 - 6 M $\Omega$ . Cells were voltage-clamped in the whole-cell patch-clamp mode. M/T cells had an ellipsoid-shaped cell body with a diameter of  $> 10$   $\mu$ m, were located in the mitral cell layer or in the external plexiform layer. We did not discriminate between mitral cells and tufted cells within the group of M/T cells. M/T cells were filled with lucifer yellow during the recording and were afterward visually inspected using fluorescent illumination.

The intracellular solution contained (in mM): 140 CsCl, 1 EGTA, 10 HEPES, 2 ATP Na-salt, 1 GTP Mg-salt, 5 QX-314 (a lidocaine derivative; Sigma-Aldrich, Taufkirchen, Germany), 0.1 lucifer yellow, 0.4 neurobiotin (Vector Laboratories, Burlingame, CA, USA); pH 7.1; osmolarity 290 mosm). The theoretical liquid junction potential between intracellular and extracellular compartments was calculated to be 4.1 mV and was not corrected.

After establishing a whole-cell recording, cells were voltage clamped to  $-60$  mV. We waited for at least 2 min before data acquisition began to allow for equilibration of intracellular solution into the dendrites. Electrical stimulation of the olfactory nerve layer was applied via a glass electrode filled with extracellular solution and connected to an Isolated Pulse Stimulator Model 2100 (A-M Systems Instruments, USA). Electrodes were visually positioned in close proximity to the corresponding glomerulus of the recording site and stimulus duration and intensity was 1 ms and 100 V, respectively. Extracellular solution containing the opioid receptor antagonist naloxone (300  $\mu$ M, Sigma Aldrich, Germany) was perfused to the MOB slice for at least 10 minutes.

All electrophysiological data were analyzed using Igor Pro software (WaveMetrics) and Excel (Microsoft). For pharmacological experiments, amplitudes of evoked EPSCs were assessed. The Student's t test was used to measure the significance of difference between two distributions. Data are expressed as means  $\pm$  SEM.

### **In vivo electrophysiology**

Electrophysiological recordings were performed by a blinded experimenter. Mice were anaesthetized with isoflurane (4%; 0.5 l/min N<sub>2</sub>O and 1.5 l/min O<sub>2</sub>) before being secured in a stereotaxic frame. Depth of anesthesia was reduced and maintained at 1.5% isoflurane during the experiment. For DRG recordings, lateral laminectomy was performed to expose the L4 DRG, as described above for *in vivo* imaging. For spinal cord, a laminectomy was performed to expose L3–L5 segments of the spinal cord and extracellular recordings were made from WDR neurons in the deep dorsal horn (lamina III–V, 200–600  $\mu$ m). Multi-unit extracellular recordings were made from DRG neurons or WDR neurons using parylene-coated tungsten electrodes (A-M Systems). Mechanical and thermal stimuli were applied to the peripheral receptive field of hindpaw glabrous skin ipsilateral to the exposed DRG. Natural stimuli (dynamic brush, von Frey hairs 0.16–26 g, noxious prod 100 and 150 g/cm<sup>2</sup> mechanical stimulation, thermal water jet 35–55°C and iced water) were applied in ascending order of intensity to receptive fields for 10 s and the total number of evoked spikes recorded. Ethyl chloride was applied for 1 s as a noxious cold stimulus and the total number of evoked spikes in 10 s was quantified. Evoked activity of neurons was visualized on an oscilloscope and discriminated on spike amplitude and waveform basis using a CED 1401 interface coupled to Spike2 software (Cambridge Electronic Design) to record waveform templates and carry out principal component analysis. For naloxone experiments, 2 mg/kg naloxone in saline was injected subcutaneously into the scruff of the neck, and the stimulation protocol repeated again 20 minutes after naloxone injection.

## Glutamate Imaging

### *In vitro* characterization

Dorsal root ganglia neurons were dissociated and cultured onto glass coverslips as described above. Neurons were treated with iGluSnFR AAV particles diluted in culture media at dilutions varying from 1/100 to 1/4000. After 2–5 days treatments, neurons expressed the virus at all tested dilutions. Coverslips were transferred to an imaging chamber and perfused with extracellular solution containing: 140 mM NaCl, 4 mM KCl, 1.8 mM CaCl<sub>2</sub>, 1 mM MgCl<sub>2</sub>, 10 mM HEPES and 5 mM glucose, with pH 7.4. Images were acquired using a Leica SP8 confocal microscope with 20x immersion objective and iGluSnFR was excited using a 488 nm laser (1%–5% laser power). Glutamate was applied at various concentrations in the bathing solution resulting in fluorescence increases localized to the plasma membrane. For analysis, ring-shaped regions of interest were drawn around the membrane and mean pixel intensity extracted and converted to  $\Delta F/F_0$ . Three-parameter dose-response curves were fit using GraphPad prism with a standard Hill Slope of 1.

### Two-photon imaging

Lumbar spinal cord slices were prepared for glutamate imaging from P9–P21 mice virally expressing iGluSnFR in sensory afferents (Marvin et al., 2013). Mice were culled by intraperitoneal injection of a ketamine (60mg/kg) and xylazine (12mg/kg) cocktail followed by decapitation and exsanguination. Spinal cords were dissected in an ice-cold oxygenated (5% CO<sub>2</sub> / 95% oxygen) dissection solution containing: 215 mM sucrose, 3 mM K-gluconate, 1.25 mM NaH<sub>2</sub>PO<sub>4</sub>, 26 mM NaHCO<sub>3</sub>, 4 mM MgSO<sub>4</sub>·7H<sub>2</sub>O, 10 mM d-glucose, 1 mM kynurenic acid and 1 mM CaCl<sub>2</sub>. Spinal cords were embedded in low-melting point agarose (2%–3%) in ASCF and then sectioned using a vibrating microtome into 500  $\mu$ m thick transverse slices in oxygenated ACSF. Slices were incubated for at least an hour in oxygenated ACSF at 37°C. The ACSF contained: 111 mM NaCl, 3.085 mM KCl, 10.99 mM d-glucose, 25 mM NaHCO<sub>3</sub>, 1.26 mM MgSO<sub>4</sub>·7H<sub>2</sub>O, 2.52 mM CaCl<sub>2</sub>, and 1.1 mM KH<sub>2</sub>PO<sub>4</sub>.

Slices with dorsal roots attached were transferred to the recording chamber and pinned using a harp. Using a 10x air objective on a Br ker 2P microscope, the dorsal roots were visualized and approached with the suction electrode. Roots were gently suctioned into the suction electrode, allowing a tight seal to form. An Isoflex (Molecular Devices) stimulus isolator was used to deliver negative current pulses of varying amplitudes. The stimulus isolator was triggered directly from the imaging software (Prairie View) and stimulation was time-locked to image acquisition. The temporal profile of the output waveform was controlled from the imaging software, with pulse duration of 400  $\mu$ s. To ensure accurate time-locking, the output from the stimulus isolator was also recorded by the imaging software.

Images were acquired using a 2-photon microscope (Bruker) with a 20x high NA water immersion objective. iGluSnFR was excited using a 920 nm laser line (Insight DS, Spectra-Physics) and 525/70 nm emission acquired by a GaAsP PMT (Hamamatsu) with gain set to maximum. The location of layer II of the dorsal horn was estimated using physical and fluorescent landmarks and a 250  $\times$  125 pixel field of view drawn, equivalent to 195  $\times$  98  $\mu$ m. Images of glutamate release in response to different single pulse stimulus intensities were acquired at 10 Hz. Throughout the experiments slices were perfused with oxygenated room temperature ACSF and, in some experiments, the bathing solution contained naloxone (100  $\mu$ M), which was applied for at least 20 minutes.

### Analysis

Image stacks were analyzed in Fiji. Trials were concatenated and then registered to the first image in the stack (accurate rigid body transformation). Regions of interest were manually identified by a blinded experimenter and the mean pixel intensity over time per ROI extracted. Signals were converted to  $\Delta F/F_0$ . Glutamate release events time-locked to the stimulus were z-scored and considered significant if  $z > 4$ . This dataset was then used for subsequent statistical analysis.

### Immunohistochemistry

One day prior to the experiment, mice were distributed onto individual homecages. Naloxone (cat# N7758, Sigma Aldrich) was dissolved in phosphate buffered saline (PBS) pH 7.4 and systemically applied by intraperitoneal injection of 2 mg/kg bodyweight (Pereira et al., 2018), while negative controls received vehicle (PBS) alone. Tested mice ( $n = 3$  each genotype) were Nav1.7<sup>control</sup> [(flox/–)(OMP/–)(Cre/–)] and Nav1.7<sup>KOMP</sup> [(fx/fx) (OMP/–)(Cre/–)] mice. For each mouse, three consecutive intraperitoneal injections with 30 min time intervals were performed. After each injection, mice were returned to their odour-rich home cages. At 24 hours after the last injection, mice were anesthetized, subjected to transcardial perfusion, followed by tissue preparation for tyrosine hydroxylase immunohistochemistry.

Mouse tissue preparation followed previously described methods (Weiss et al., 2011; Bolz et al., 2017). Adult mice (7–9 weeks-of-age) were anaesthetized using a mixture of 165 mg/kg body weight ketamine (Pharmacia GmbH, Berlin) and 11 mg/kg body weight xylazine (Bayer Health Care, Leverkusen), and were transcardially perfused with phosphate-buffered saline (PBS) pH 7.4, followed by 4% (w/v) paraformaldehyde in PBS. Olfactory bulbs (OBs) were dissected, incubated for 2 h in fixative and for overnight in 30% sucrose in PBS at 4°C, embedded in O.C.T. (Tissue-Tek), and snap-frozen in a dry ice/2-methylbutane bath. Frozen tissue sections (18  $\mu$ m) were collected on a cryostat (Microm HM525, Walldorf, Germany) and stored at –80°C until subjected to immunohistochemistry. For tyrosine hydroxylase (TH) immunostaining, tissue sections were rinsed in PBS, treated for 1 h with blocking buffer containing 0.3% Triton X-100 and 4% normal horse serum (NHS, Vector Laboratories) prepared in PBS, followed by incubation in TH primary antibody (mouse monoclonal, cat# 22941, RRID:AB\_572268, ImmunoStar, Hudson, WI, USA) diluted 1:2000 in blocking solution. Tissue sections were washed three times 10 min in PBS and incubated in Alexa Fluor 488 conjugated goat-anti-mouse secondary antibody (1:1000, Thermo Fisher Scientific cat# A-11029, RRID:AB\_2534088) for 1 h in the dark. Tissue sections were rinsed in PBS, the

nuclei counterstained with Hoechst 33342 (1:10,000 in PBS, Invitrogen) for 10 min, rinsed again in PBS, and coverslipped using fluorescence mounting medium (DAKO). All procedures were conducted at room temperature with the exception of tissue incubation in primary antibody solution at 4°C.

Confocal fluorescence images were acquired on a Zeiss LSM 880 confocal microscope containing a 32-channel GaAsP-PMT and 2-channel PMT QUASAR detector. Each image shown in [Figure 6C](#) refers to a single 2.5  $\mu\text{m}$  thick optical section. Images were assembled and minimally adjusted in brightness using Adobe PhotoShop Elements 10.

### Human Sensory Testing

Perception of tonic radiant heat was assessed at baseline and during intravenous administration of saline or naloxone (12 mg), in a randomized order. The perception of long-lasting, tonic nociceptive stimuli is generally considered to be less confounded by attention than transient noxious stimuli, involving rapid, attentional shifts that can confound perceptual measures ([Legrain et al., 2011](#)). Psychophysical assessment was carried out by an experimenter blind to the pharmacological condition. Tonic radiant heat was generated by a CO<sub>2</sub> laser, whose power is regulated using a feedback control based on an online measurement of skin temperature at the site of stimulation (Laser Stimulation Device, SIFEC, Belgium). The CO<sub>2</sub> laser selectively stimulates both A-delta and C fibers. On each trial, tonic radiant heat was delivered to the forearm for 25 s and kept constant at either 45 or 48 °C ([Churyukanov et al., 2012](#)). Participants were asked to rate the intensity of the thermal sensation on a visual analog scale throughout the trial (0 = no sensation, 100 = worst pain imaginable). Three trials per stimulus temperature were given on each session (baseline, saline and naloxone) in a randomized order.

### QUANTIFICATION AND STATISTICAL ANALYSIS

For *in vivo* imaging experiments, *n* refers to the number of cells responding to any stimulus. For electrophysiology experiments, *n* refers to the number of recorded cells. For glutamate imaging experiments, *n* refers to the number of regions of interest. For all imaging and physiology data, the number of animals used is indicated in the legend. For behavioral experiments, *n* refers to the number of animals.

Datasets are presented using appropriate summary statistics as indicated in the legend. Error bars denote mean  $\pm$  95% confidence interval or mean  $\pm$  SEM, as indicated in the legend. The 95% confidence interval around proportions was estimated using the Wilson-Brown method. Tests of statistical comparison for each dataset are described in detail in figure legends. For grouped data, we made the appropriate correction for multiple comparisons. We set an  $\alpha$ -value of  $p = 0.05$  for significance testing and report all *p* values resulting from planned hypothesis testing.

No sample size calculation was performed, however our samples are similar to those used in the field.

**Neuron, Volume 109**

**Supplemental information**

**A central mechanism of analgesia in mice  
and humans lacking the sodium channel Na<sub>v</sub>1.7**

**Donald Iain MacDonald, Shafaq Sikandar, Jan Weiss, Martina Pyrski, Ana P. Luiz, Queensta Millet, Edward C. Emery, Flavia Mancini, Gian D. Iannetti, Sascha R.A. Alles, Manuel Arcangeletti, Jing Zhao, James J. Cox, Robert M. Brownstone, Frank Zufall, and John N. Wood**



**A Voltage-gated sodium current recordings from WT and Na<sub>v</sub>1.7 KO DRG neurons**

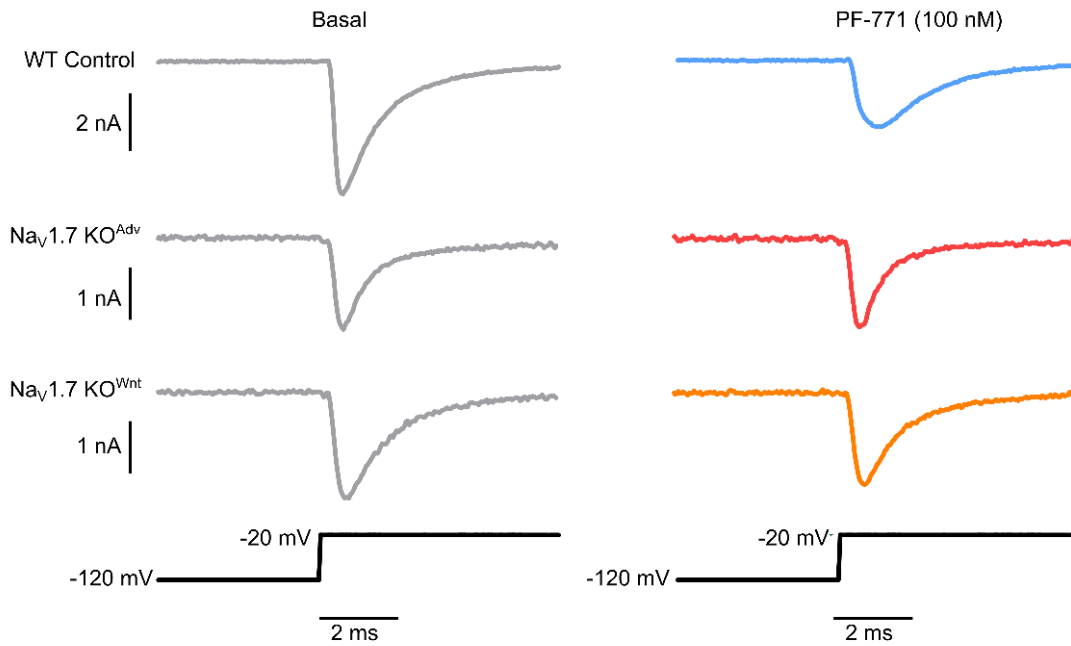

**B WT Control**

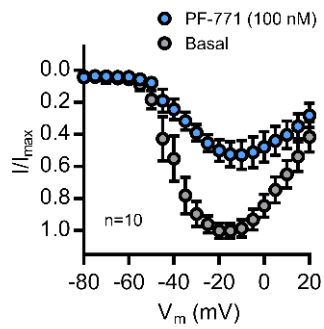

**C Na<sub>v</sub>1.7 KO<sup>Adv</sup>**

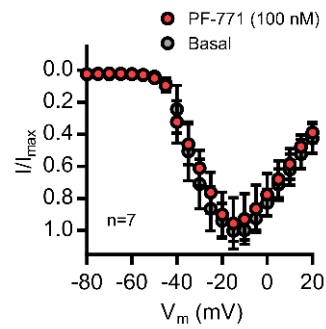

**D Na<sub>v</sub>1.7 KO<sup>Wnt</sup>**

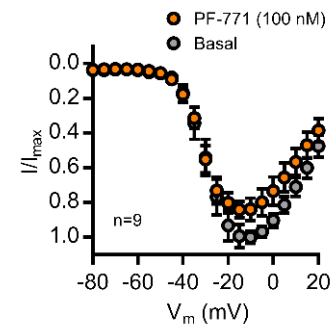

**Figure S1 (related to Figure 1). Conditional deletion of *SCN9A* in sensory neurons abolishes voltage-gated sodium channel currents attributed to Nav1.7.**

(A) Example current traces showing voltage-gated sodium channel currents activated by a 100 mV voltage-step from -120 mV to 20 mV recorded from WT and Nav1.7 KO DRG neurons (grey). Application of the Nav1.7-specific antagonist PF-05089771 (PF-771, 100 nM for 5 minutes) caused a marked reduction in sodium currents in WT neurons (blue) but not in cells from KO<sup>Adv</sup> (red) or KO<sup>Wnt</sup> (orange) mice.

(B) Current-voltage (I-V) curve showing that application of the Nav1.7-specific antagonist PF-771 reduces voltage-gated sodium currents in WT sensory neurons. n=10 cells.

(C) I-V curve showing PF-771 did not markedly affect voltage-gated sodium currents in sensory neurons from Nav1.7 KO<sup>Adv</sup> mice. n=7 cells.

(D) I-V curve showing PF-771 did not markedly affect voltage-gated sodium currents in sensory neurons from Nav1.7 KO<sup>Wnt</sup> mice. n=9 cells.

Error bars denote standard error of the mean.

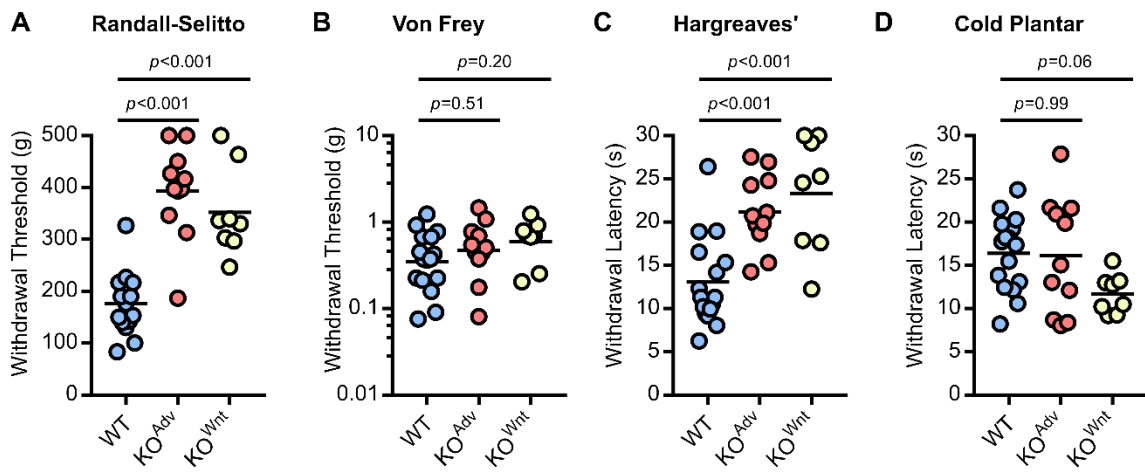

**Figure S2 (related to Figure 1). Peripheral Nav1.7 knockout mice show reduced pain sensitivity.**

(A) Both Nav1.7 KO lines show increased tail withdrawal thresholds to noxious mechanical stimuli on the Randall-Selitto test.

(B) Nav1.7 deletion has no effect on withdrawal thresholds to punctate tactile stimuli on the Von Frey test

(C) Both Nav1.7 KO lines show increased withdrawal latencies to radiant heat stimuli on the Hargreaves' test.

(D) Nav1.7 KO<sup>Adv</sup> mice show unchanged withdrawal latencies to dry ice stimuli on the Cold Plantar test compared to control, however Nav1.7 KO<sup>Wnt</sup> animals display a small, but not statistically significant, hypersensitivity.

For (A) to (D), means for each KO line were compared to WT control using One-Way ANOVA followed by post-hoc Dunnett's test. n=16 mice for WT, n=11 mice for KO<sup>Adv</sup> and N=8 mice for KO<sup>Wnt</sup>.

**A** Viral expression of GCaMP6f

AAV1  
CAG-GCaMP6f  
5 $\mu$ l i.p.

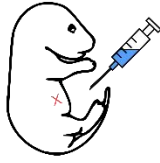

P2 mouse pup

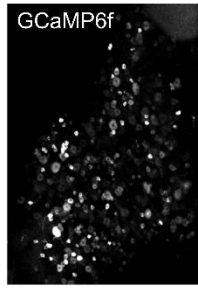

816  $\mu$ m

**B** Distribution of noxious responses

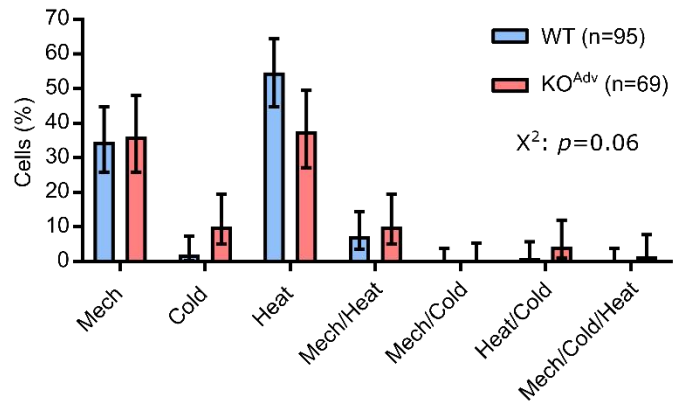

**C** Polymodality

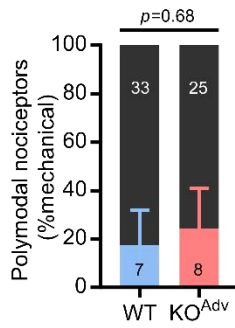

**D** Magnitude of noxious responses

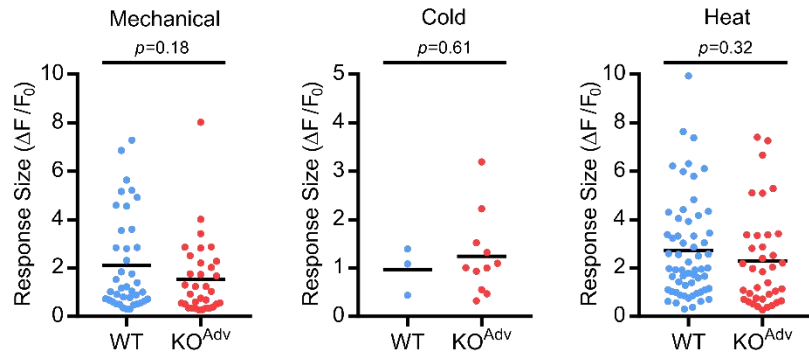

**Figure S3 (related to Figure 1). *In vivo* calcium imaging of Nav1.7-deficient sensory neurons virally expressing GCaMP6f.**

(A) Confocal z-stack of DRG imaged *in vivo* from a Nav1.7 KO<sup>Adv</sup> mouse virally expressing GCaMP6f. AAV1-CAG-GCaMP6f was delivered by intraperitoneal injection into P2 mouse pups.

(B) Bar plot summarizing the distribution of all sensory neurons that responded to different noxious stimuli in WT and KO<sup>Adv</sup> animals. The error bars represent 95% confidence intervals and proportions were compared using Chi-Square test ( $\chi^2$ ). n=95 cells from 4 WT mice (blue) and n=69 cells from 4 KO<sup>Adv</sup> mice (red). Markedly fewer cells responded to cold in these animals compared to in Pirt-GCaMP3 mice, likely due to biased expression of the virally-delivered GCaMP6f.

(D) Bar plot showing similar prevalence of polymodal nociceptors in WT and KO<sup>Adv</sup> mice. Polymodal nociceptors are defined as pinch-sensitive neurons that respond to any noxious thermal stimulus (colour) and are expressed as a fraction of mechanically-sensitive cells (black). The error bars represent 95% confidence intervals and proportions were compared using the Chi-Square ( $\chi^2$ ) test with Yates Correction. n=40 cells from WT and n=33 cells from KO<sup>Adv</sup>.

(E-F) Scatter plots showing similar peak calcium responses ( $\Delta F/F_0$ ) evoked by different noxious stimuli for WT and KO<sup>Adv</sup>. Mean response magnitude of KO<sup>Adv</sup> was compared to WT control using an unpaired t test. Mechanical: n=40 cells from WT and n=33 cells from KO<sup>Adv</sup>. Cold: n=3 cells from WT and n=11 cells from KO<sup>Adv</sup>. Heat: n=60 cells from WT and n=37 cells from KO<sup>Adv</sup>.

**A DRG culture**

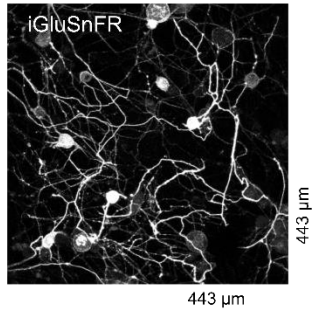

**B i. Dose-response curve**

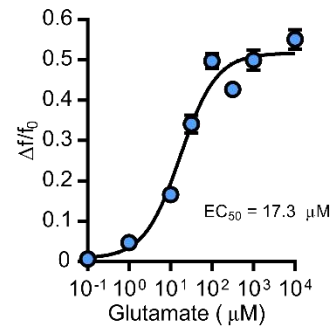

**ii.**

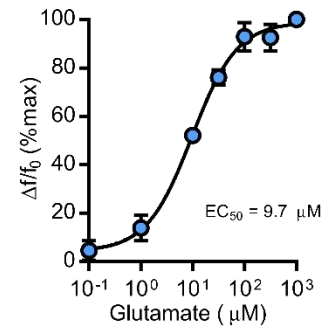

**C Neonatal AAV injection**

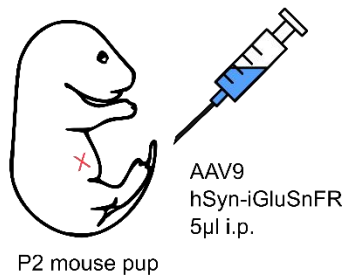

**D Spinal cord slice**

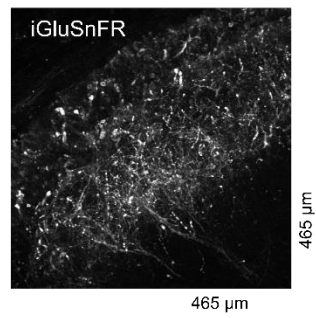

**E DRG in vivo**

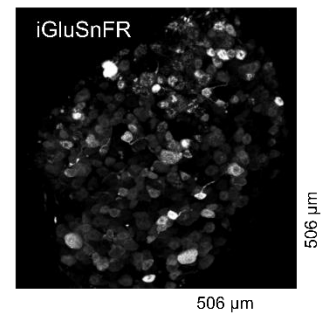

**Figure S4 (related to Figure 4). Expression and function of iGluSnFR in sensory afferents**

(A) Confocal z-stack of iGluSnFR-expressing cultured dorsal root ganglia neurons, *in vitro*.

(B) Dose-response curve (i.) of iGluSnFR fluorescence ( $\Delta F/F_0$ ) in cultured DRG neurons against extracellular glutamate concentration. n=36-154 neurons depending on tested concentration.  $EC_{50}=17.3 \mu\text{M}$ .  $r^2=0.426$ . Dose-response curve (ii.) of normalized iGluSnFR fluorescence (% maximum) in cultured DRG neurons against extracellular glutamate concentration. In this experiment, each cell was exposed to all glutamate concentrations tested. n=45 neurons.  $EC_{50}=9.7 \mu\text{M}$ .  $r^2=0.625$ .

(C) Schematic of neonatal virus injection.

(D) Two-photon z-stack of iGluSnFR-expressing sensory afferent terminals in dorsal horn of transverse spinal cord slice, *ex vivo*. No spinal cord neuron somata express iGluSnFR.

(E) Confocal z-stack of iGluSnFR-expressing sensory afferent cell bodies in L4 dorsal root ganglion, *in vivo*.



**A Spontaneous EPSCs**

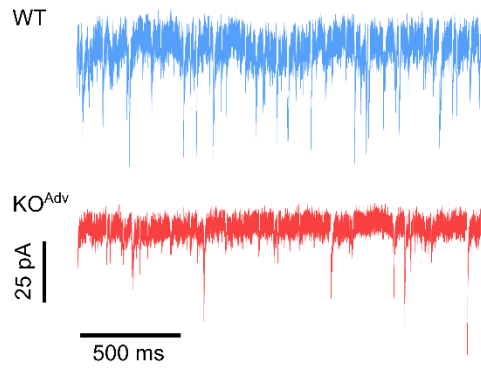

**B sEPSC Frequency**

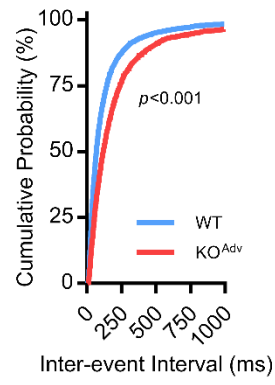

**C sEPSC Amplitude**

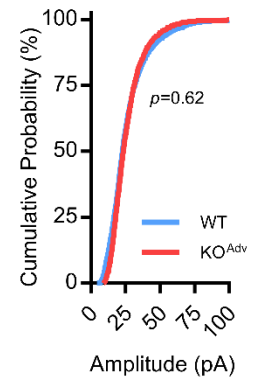

**Figure S5 (related to Figure 4). Nav1.7 deletion reduces frequency, but not amplitude, of spontaneous excitatory post-synaptic currents.**

(A) Example traces showing spontaneous excitatory post-synaptic currents (sEPSCs) recorded from lamina II neurons in WT and KO<sup>Adv</sup> mice.

(B) Cumulative probability plots showing sEPSC frequency is reduced in KO<sup>Adv</sup> animals.

(C) Cumulative probability plots showing sEPSC amplitude is unaltered in KO<sup>Adv</sup> animals.

Means were compared using unpaired t tests. n=6972 events from 40 WT slices, and n=2406 events from 23 KO<sup>Adv</sup> slices.

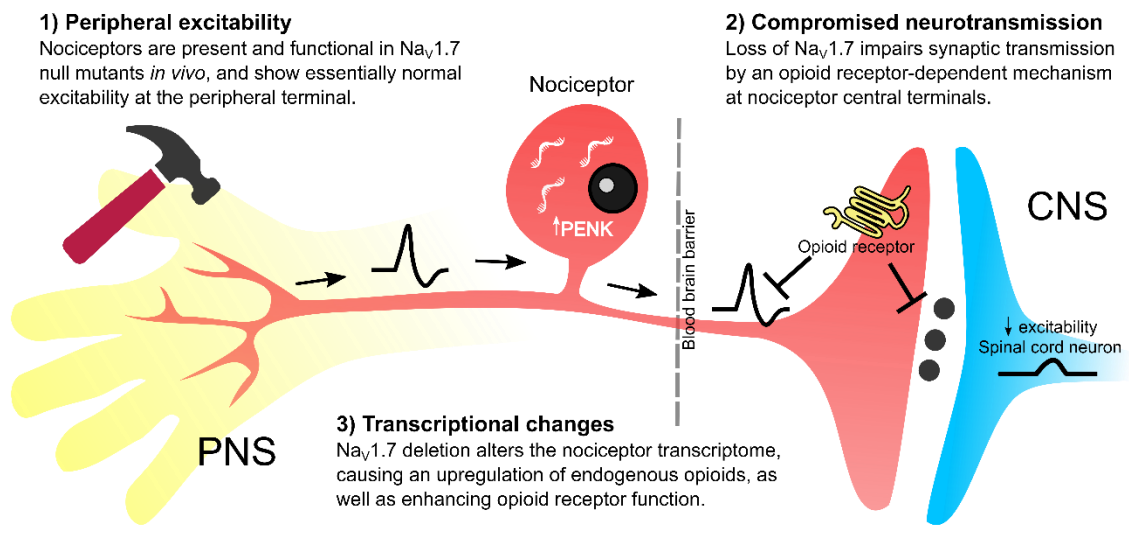

**Figure S6 (related to Figure 8). Mechanisms of analgesia after loss of Nav1.7.**

Cartoon showing the effects of Nav1.7 deletion on nociceptor function.

- 1) *Peripheral excitability*: Some, but not all, humans with Nav1.7 null mutations show reduced intra-epidermal fibre density, while Nav1.7-deficient sensory neurons are less excitable *in vitro*. But, *in vivo*, terminal excitability is essentially normal, and neurogenic inflammation is preserved. Thus the peripheral terminal is likely not the locus of analgesia.
- 2) *Compromised neurotransmission*: Synaptic transfer from nociceptor terminals to spinal cord dorsal horn neurons is impaired after loss of Nav1.7. These synaptic deficits depend on opioid receptors, which can suppress both synaptic release and terminal excitability. As reported by Alles *et al* (2020), dorsal horn neurons are also less excitable due to absent post-synaptic Nav1.7.
- 3) *Transcriptional changes*: Loss of Nav1.7 leads to an upregulation of PENK, encoding preproenkephalin, resulting in increased endogenous opioid signalling. Concomitantly, reduced sodium ingress following deletion of Nav1.7 leads to enhanced opioid receptor function inhibiting neurotransmitter release. Analgesia in mice and humans lacking Nav1.7 is thus dependent on opioids.

| PARTICIPANT | MUTATION                                                                                                                                                                                                                               | CHARACTERIZATION                                                                                               |
|-------------|----------------------------------------------------------------------------------------------------------------------------------------------------------------------------------------------------------------------------------------|----------------------------------------------------------------------------------------------------------------|
| Male 1      | c.377+5C>T (intronic) – point mutation in splice donor site in intron 3 resulting in the use of a cryptic splice donor site, leading to a frameshift and premature stop codon in exon 4 (McDermott et al., 2019; Shaikh et al., 2018). | Pathogenic (Shaikh et al., 2018).                                                                              |
|             | c.2686C>T (R896W) – amino acid change in exon 16 (McDermott et al., 2019).                                                                                                                                                             | No Nav1.7 current when expressed in HEK293T cells (McDermott et al., 2019).                                    |
| Male 2      | c.2488C>T (R830X) – premature stop codon in exon 16 (Ramirez et al., 2014).                                                                                                                                                            | No Nav1.7 current when expressed in HEK293T cells (McDermott et al., 2019).                                    |
|             | c.5318delA (FS1773) – 1 bp deletion in exon 27, that induces a frameshift at position 1773 in the C terminal domain (Ramirez et al., 2014).                                                                                            | 8-fold reduction in Nav1.7 current density versus WT when expressed in HEK293T cells (McDermott et al., 2019). |

**Table S1 (related to Figure 8). Mutations in *SCN9A* of human participants.**

Summary of previous genetic and functional characterization of the *SCN9A* mutations carried by the compound heterozygous male participants in this study.

| PCR PRODUCT            | FORWARD PRIMER                  | REVERSE PRIMER                                                        |
|------------------------|---------------------------------|-----------------------------------------------------------------------|
| Pirt-GCaMP3            |                                 |                                                                       |
| Pirt WT (300 b.p.)     | TCCCCCTCTACTGAGA<br>GCCAG       | GGCCCTATCATCCTGAGC<br>AC                                              |
| GCaMP3 (400 b.p.)      | TCCCCCTCTACTGAGA<br>GCCAG       | ATAGCTCTGACTGCGTGA<br>CC                                              |
| Nav1.7 flox            |                                 |                                                                       |
| Nav1.7 WT (382 b.p.)   | CAGAGATTTCTGCAT<br>TAGAATTTGTTC | GCAAATCATAATTAATTC<br>ATGACACAG                                       |
| Nav1.7 flox (527 b.p.) | CAGAGATTTCTGCAT<br>TAGAATTTGTTC | GCAAATCATAATTAATTC<br>ATGACACAG<br>or<br>AGTCTTTGTGGCACACGT<br>TACCTC |
| Nav1.7 KO (395 b.p.)   | CAGAGATTTCTGCAT<br>TAGAATTTGTTC | GTTCTCTCTTTGAATGC<br>TGGGCA                                           |
| Advillin-Cre           |                                 |                                                                       |
| Advillin WT (480 b.p.) | CCCTGTTCACTGTGA<br>GTAGG        | AGTATCTGGTAGGTGCT<br>TCCAG                                            |
| Cre (180 b.p.)         | CCCTGTTCACTGTGA<br>GTAGG        | GCGATCCCTGAACATGTC<br>CATC                                            |
| Wnt1-Cre               |                                 |                                                                       |
| Wnt1-Cre (628 b.p.)    | CTCATTGTCTGTGGC<br>CCTGA        | AAATGTTGCTGGATAGTT<br>TTTACTGCC                                       |
| OMP-Cre                |                                 |                                                                       |
| OMP WT                 | TGGCAACAGCTGTA<br>GCACCT        | ACAGAGGCCTTTAGGTT<br>GGC                                              |
| Cre                    | CATTTGGGCCAGCTA<br>AACAT        | CCCGGCAAAACAGGTAG<br>TTA                                              |

**Table S2 (related to Figures 1, 2, 3, 4, 5, 6, 7 and 8). Primers for mouse line genotyping.**  
Forward and reverse primers required for each PCR used for genotyping.
